# Supplementary material for: Beeswax-Modified Textiles: Method of Preparation and Assessment of Antimicrobial Properties
Source: PubMed Central journal article supplement (PMC7077388; doi:10.3390/polym12020344), 2020-02-05
Supplement: polymers-12-00344-s001.pdf [file polymers-12-00344-s001.pdf]

**Table S1.** Putative identification of metabolites in beeswax based on Lipidmaps database**MS search for 103.0747 *m/z***

| Compound               | Formula                                       | Compound MW | Adduct type | Adduct <i>m/z</i> calc | Delta [ppm] | Database  |
|------------------------|-----------------------------------------------|-------------|-------------|------------------------|-------------|-----------|
| Ethyl propionate       | C <sub>5</sub> H <sub>10</sub> O <sub>2</sub> | 102.0681    | M+H         | 103.0754               | -6.4        | Lipidmaps |
| Methyl butyrate        | C <sub>5</sub> H <sub>10</sub> O <sub>2</sub> | 102.0681    | M+H         | 103.0754               | -6.4        | Lipidmaps |
| 2-hydroxy-pentan-3-one | C <sub>5</sub> H <sub>10</sub> O <sub>2</sub> | 102.0681    | M+H         | 103.0754               | -6.4        | Lipidmaps |
| 3-Hydroxypentan-2-one  | C <sub>5</sub> H <sub>10</sub> O <sub>2</sub> | 102.0681    | M+H         | 103.0754               | -6.4        | Lipidmaps |

**MS search for 123.0419**

|                                            |                                              |          |      |          |   |           |
|--------------------------------------------|----------------------------------------------|----------|------|----------|---|-----------|
| [FA methyl(4:1)] 2-methyl-2E-butenoic acid | C <sub>5</sub> H <sub>8</sub> O <sub>2</sub> | 100.0524 | M+Na | 123.0416 | 2 | Lipidmaps |
| [FA methyl(4:1)] 3-methyl-3-butenoic acid  | C <sub>5</sub> H <sub>8</sub> O <sub>2</sub> | 100.0524 | M+Na | 123.0416 | 2 | Lipidmaps |
| [FA (5:1)] 2-pentenoic acid                | C <sub>5</sub> H <sub>8</sub> O <sub>2</sub> | 100.0524 | M+Na | 123.0416 | 2 | Lipidmaps |
| [FA (5:1)] 3-pentenoic acid                | C <sub>5</sub> H <sub>8</sub> O <sub>2</sub> | 100.0524 | M+Na | 123.0416 | 2 | Lipidmaps |
| [FA (5:1)] 4-pentenoic acid                | C <sub>5</sub> H <sub>8</sub> O <sub>2</sub> | 100.0524 | M+Na | 123.0416 | 2 | Lipidmaps |
| Ethyl 2E-propenoate                        | C <sub>5</sub> H <sub>8</sub> O <sub>2</sub> | 100.0524 | M+Na | 123.0416 | 2 | Lipidmaps |
| Gamma-valerolactone                        | C <sub>5</sub> H <sub>8</sub> O <sub>2</sub> | 100.0524 | M+Na | 123.0416 | 2 | Lipidmaps |

**MS search for 123.0419 *m/z***

| Compound                                   | Formula                                      | Compound MW | Adduct type | Adduct <i>m/z</i> calc | Delta [ppm] | Database  |
|--------------------------------------------|----------------------------------------------|-------------|-------------|------------------------|-------------|-----------|
| [FA methyl(4:1)] 2-methyl-2E-butenoic acid | C <sub>5</sub> H <sub>8</sub> O <sub>2</sub> | 100.0524    | M+Na        | 123.0416               | 2           | Lipidmaps |
| [FA methyl(4:1)] 3-methyl-3-butenoic acid  | C <sub>5</sub> H <sub>8</sub> O <sub>2</sub> | 100.0524    | M+Na        | 123.0416               | 2           | Lipidmaps |
| [FA (5:1)] 2-pentenoic acid                | C <sub>5</sub> H <sub>8</sub> O <sub>2</sub> | 100.0524    | M+Na        | 123.0416               | 2           | Lipidmaps |
| [FA (5:1)] 3-pentenoic acid                | C <sub>5</sub> H <sub>8</sub> O <sub>2</sub> | 100.0524    | M+Na        | 123.0416               | 2           | Lipidmaps |
| [FA (5:1)] 4-pentenoic acid                | C <sub>5</sub> H <sub>8</sub> O <sub>2</sub> | 100.0524    | M+Na        | 123.0416               | 2           | Lipidmaps |
| Ethyl 2E-propenoate                        | C <sub>5</sub> H <sub>8</sub> O <sub>2</sub> | 100.0524    | M+Na        | 123.0416               | 2           | Lipidmaps |
| Gamma-valerolactone                        | C <sub>5</sub> H <sub>8</sub> O <sub>2</sub> | 100.0524    | M+Na        | 123.0416               | 2           | Lipidmaps |

**MS search for 135.1133 *m/z***

| Compound                    | Formula                        | Compound MW | Adduct type | Adduct <i>m/z</i> calc | Delta [ppm] | Database  |
|-----------------------------|--------------------------------|-------------|-------------|------------------------|-------------|-----------|
| 3-methyl-1-heptene          | C <sub>8</sub> H <sub>16</sub> | 112.1252    | M+Na        | 135.1144               | -8.3        | Lipidmaps |
| Cis-1,2-dimethylcyclohexane | C <sub>8</sub> H <sub>16</sub> | 112.1252    | M+Na        | 135.1144               | -8.3        | Lipidmaps |

|                               |                                |          |      |          |      |           |
|-------------------------------|--------------------------------|----------|------|----------|------|-----------|
| Trans-1,2-dimethylcyclohexane | C <sub>8</sub> H <sub>16</sub> | 112.1252 | M+Na | 135.1144 | -8.3 | Lipidmaps |
| 1,4-dimethylcyclohexane       | C <sub>8</sub> H <sub>16</sub> | 112.1252 | M+Na | 135.1144 | -8.3 | Lipidmaps |
| Ethylcyclohexane              | C <sub>8</sub> H <sub>16</sub> | 112.1252 | M+Na | 135.1144 | -8.3 | Lipidmaps |

**MS search for 147.0783 m/z**

| Compound                      | Formula                          | Compound MW | Adduct type | Adduct m/z calc | Delta [ppm] | Database  |
|-------------------------------|----------------------------------|-------------|-------------|-----------------|-------------|-----------|
| [FA (8:2)] 2,4-octadienal     | C <sub>8</sub> H <sub>12</sub> O | 124.0888    | M+Na        | 147.078         | 1.8         | Lipidmaps |
| [FA (8:2)] 5,7-octadienal     | C <sub>8</sub> H <sub>12</sub> O | 124.0888    | M+Na        | 147.078         | 1.8         | Lipidmaps |
| 2,4-Dimethyl-2E,4E-hexadienal | C <sub>8</sub> H <sub>12</sub> O | 124.0888    | M+Na        | 147.078         | 1.8         | Lipidmaps |
| 2E,7-Octadienal               | C <sub>8</sub> H <sub>12</sub> O | 124.0888    | M+Na        | 147.078         | 1.8         | Lipidmaps |
| 2E,6E-Octadienal              | C <sub>8</sub> H <sub>12</sub> O | 124.0888    | M+Na        | 147.078         | 1.8         | Lipidmaps |
| 2E,4Z-Octadienal              | C <sub>8</sub> H <sub>12</sub> O | 124.0888    | M+Na        | 147.078         | 1.8         | Lipidmaps |
| 2E,6Z-Octadienal              | C <sub>8</sub> H <sub>12</sub> O | 124.0888    | M+Na        | 147.078         | 1.8         | Lipidmaps |
| 3E,5E-Octadien-2-one          | C <sub>8</sub> H <sub>12</sub> O | 124.0888    | M+Na        | 147.078         | 1.8         | Lipidmaps |
| 6-Methyl-3E,5-heptadien-2-one | C <sub>8</sub> H <sub>12</sub> O | 124.0888    | M+Na        | 147.078         | 1.8         | Lipidmaps |

**MS search for 293.1903 m/z**

| Compound                                                   | Formula                                        | Compound MW | Adduct type | Adduct m/z calc | Delta [ppm] | Database  |
|------------------------------------------------------------|------------------------------------------------|-------------|-------------|-----------------|-------------|-----------|
| [FA dimethyl(14:0)] 2,4-dimethyl-2E-tetradecenoic acid     | C <sub>16</sub> H <sub>30</sub> O <sub>2</sub> | 254.2246    | M+K         | 293.1877        | 8.7         | Lipidmaps |
| [FA methyl(15:0)] 14-methyl-4-pentadecenoic acid           | C <sub>16</sub> H <sub>30</sub> O <sub>2</sub> | 254.2246    | M+K         | 293.1877        | 8.7         | Lipidmaps |
| [FA (6:2/10:0)] 2-hexyl-2-decenoic acid                    | C <sub>16</sub> H <sub>30</sub> O <sub>2</sub> | 254.2246    | M+K         | 293.1877        | 8.7         | Lipidmaps |
| [FA methyl(5:2/10:0)] 6-isopentyl-9-methyl-5-decenoic acid | C <sub>16</sub> H <sub>30</sub> O <sub>2</sub> | 254.2246    | M+K         | 293.1877        | 8.7         | Lipidmaps |
| [FA (16:1)] 7-hexadecenoic acid                            | C <sub>16</sub> H <sub>30</sub> O <sub>2</sub> | 254.2246    | M+K         | 293.1877        | 8.7         | Lipidmaps |
| [FA (16:1)] 10Z-hexadecenoic acid                          | C <sub>16</sub> H <sub>30</sub> O <sub>2</sub> | 254.2246    | M+K         | 293.1877        | 8.7         | Lipidmaps |
| [FA (16:1)] 10-hexadecenoic acid                           | C <sub>16</sub> H <sub>30</sub> O <sub>2</sub> | 254.2246    | M+K         | 293.1877        | 8.7         | Lipidmaps |
| [FA (16:1)] 11-hexadecenoic acid                           | C <sub>16</sub> H <sub>30</sub> O <sub>2</sub> | 254.2246    | M+K         | 293.1877        | 8.7         | Lipidmaps |
| [FA (16:1)] 11Z-hexadecenoic acid                          | C <sub>16</sub> H <sub>30</sub> O <sub>2</sub> | 254.2246    | M+K         | 293.1877        | 8.7         | Lipidmaps |
| [FA (16:1)] 13-hexadecenoic acid                           | C <sub>16</sub> H <sub>30</sub> O <sub>2</sub> | 254.2246    | M+K         | 293.1877        | 8.7         | Lipidmaps |
| [FA (16:1)] 13Z-hexadecenoic acid                          | C <sub>16</sub> H <sub>30</sub> O <sub>2</sub> | 254.2246    | M+K         | 293.1877        | 8.7         | Lipidmaps |
| [FA (16:1)] 2Z-hexadecenoic acid                           | C <sub>16</sub> H <sub>30</sub> O <sub>2</sub> | 254.2246    | M+K         | 293.1877        | 8.7         | Lipidmaps |
| [FA (16:1)] 3E-hexadecenoic acid                           | C <sub>16</sub> H <sub>30</sub> O <sub>2</sub> | 254.2246    | M+K         | 293.1877        | 8.7         | Lipidmaps |
| [FA (16:1)] 6Z-hexadecenoic acid                           | C <sub>16</sub> H <sub>30</sub> O <sub>2</sub> | 254.2246    | M+K         | 293.1877        | 8.7         | Lipidmaps |
| Hexadec-7Z-enoic acid                                      | C <sub>16</sub> H <sub>30</sub> O <sub>2</sub> | 254.2246    | M+K         | 293.1877        | 8.7         | Lipidmaps |
| 16:1(5Z)                                                   | C <sub>16</sub> H <sub>30</sub> O <sub>2</sub> | 254.2246    | M+K         | 293.1877        | 8.7         | Lipidmaps |
| 15:1(4)(13Me)                                              | C <sub>16</sub> H <sub>30</sub> O <sub>2</sub> | 254.2246    | M+K         | 293.1877        | 8.7         | Lipidmaps |
| 16:1(4)                                                    | C <sub>16</sub> H <sub>30</sub> O <sub>2</sub> | 254.2246    | M+K         | 293.1877        | 8.7         | Lipidmaps |

|                          |                                                |          |     |          |     |           |
|--------------------------|------------------------------------------------|----------|-----|----------|-----|-----------|
| 10E-Tetradecenyl acetate | C <sub>16</sub> H <sub>30</sub> O <sub>2</sub> | 254.2246 | M+K | 293.1877 | 8.7 | Lipidmaps |
| 11E-Tetradecenyl acetate | C <sub>16</sub> H <sub>30</sub> O <sub>2</sub> | 254.2246 | M+K | 293.1877 | 8.7 | Lipidmaps |
| 12E-Tetradecenyl acetate | C <sub>16</sub> H <sub>30</sub> O <sub>2</sub> | 254.2246 | M+K | 293.1877 | 8.7 | Lipidmaps |
| 3E-Tetradecenyl acetate  | C <sub>16</sub> H <sub>30</sub> O <sub>2</sub> | 254.2246 | M+K | 293.1877 | 8.7 | Lipidmaps |
| 5E-Tetradecenyl acetate  | C <sub>16</sub> H <sub>30</sub> O <sub>2</sub> | 254.2246 | M+K | 293.1877 | 8.7 | Lipidmaps |
| 6E-Tetradecenyl acetate  | C <sub>16</sub> H <sub>30</sub> O <sub>2</sub> | 254.2246 | M+K | 293.1877 | 8.7 | Lipidmaps |
| 7E-Tetradecenyl acetate  | C <sub>16</sub> H <sub>30</sub> O <sub>2</sub> | 254.2246 | M+K | 293.1877 | 8.7 | Lipidmaps |
| 8E-Tetradecenyl acetate  | C <sub>16</sub> H <sub>30</sub> O <sub>2</sub> | 254.2246 | M+K | 293.1877 | 8.7 | Lipidmaps |
| 9E-Tetradecenyl acetate  | C <sub>16</sub> H <sub>30</sub> O <sub>2</sub> | 254.2246 | M+K | 293.1877 | 8.7 | Lipidmaps |
| 10Z-Tetradecenyl acetate | C <sub>16</sub> H <sub>30</sub> O <sub>2</sub> | 254.2246 | M+K | 293.1877 | 8.7 | Lipidmaps |
| 11Z-Tetradecenyl acetate | C <sub>16</sub> H <sub>30</sub> O <sub>2</sub> | 254.2246 | M+K | 293.1877 | 8.7 | Lipidmaps |
| 12Z-Tetradecenyl acetate | C <sub>16</sub> H <sub>30</sub> O <sub>2</sub> | 254.2246 | M+K | 293.1877 | 8.7 | Lipidmaps |
| 3Z-Tetradecenyl acetate  | C <sub>16</sub> H <sub>30</sub> O <sub>2</sub> | 254.2246 | M+K | 293.1877 | 8.7 | Lipidmaps |
| 5Z-Tetradecenyl acetate  | C <sub>16</sub> H <sub>30</sub> O <sub>2</sub> | 254.2246 | M+K | 293.1877 | 8.7 | Lipidmaps |
| 6Z-Tetradecenyl acetate  | C <sub>16</sub> H <sub>30</sub> O <sub>2</sub> | 254.2246 | M+K | 293.1877 | 8.7 | Lipidmaps |
| 7Z-Tetradecenyl acetate  | C <sub>16</sub> H <sub>30</sub> O <sub>2</sub> | 254.2246 | M+K | 293.1877 | 8.7 | Lipidmaps |
| 8Z-Tetradecenyl acetate  | C <sub>16</sub> H <sub>30</sub> O <sub>2</sub> | 254.2246 | M+K | 293.1877 | 8.7 | Lipidmaps |
| 9Z-Tetradecenyl acetate  | C <sub>16</sub> H <sub>30</sub> O <sub>2</sub> | 254.2246 | M+K | 293.1877 | 8.7 | Lipidmaps |
| Ethyl 7E-tetradecenoate  | C <sub>16</sub> H <sub>30</sub> O <sub>2</sub> | 254.2246 | M+K | 293.1877 | 8.7 | Lipidmaps |
| Ethyl 9E-tetradecenoate  | C <sub>16</sub> H <sub>30</sub> O <sub>2</sub> | 254.2246 | M+K | 293.1877 | 8.7 | Lipidmaps |
| Ethyl 9Z-tetradecenoate  | C <sub>16</sub> H <sub>30</sub> O <sub>2</sub> | 254.2246 | M+K | 293.1877 | 8.7 | Lipidmaps |
| Dodecyl 2E-butenoate     | C <sub>16</sub> H <sub>30</sub> O <sub>2</sub> | 254.2246 | M+K | 293.1877 | 8.7 | Lipidmaps |
| (Z)-7-Dodecenyl butyrate | C <sub>16</sub> H <sub>30</sub> O <sub>2</sub> | 254.2246 | M+K | 293.1877 | 8.7 | Lipidmaps |
| Vittatalactone           | C <sub>16</sub> H <sub>30</sub> O <sub>2</sub> | 254.2246 | M+K | 293.1877 | 8.7 | Lipidmaps |
| 15R-Hexadecanolide       | C <sub>16</sub> H <sub>30</sub> O <sub>2</sub> | 254.2246 | M+K | 293.1877 | 8.7 | Lipidmaps |
| 16-Hexadecanolide        | C <sub>16</sub> H <sub>30</sub> O <sub>2</sub> | 254.2246 | M+K | 293.1877 | 8.7 | Lipidmaps |
| Delta-hexadecalactone    | C <sub>16</sub> H <sub>30</sub> O <sub>2</sub> | 254.2246 | M+K | 293.1877 | 8.7 | Lipidmaps |

#### MS search for 304.2641 m/z

| Compound                                        | Formula                            | Compound MW | Adduct type | Adduct m/z calc | Delta [ppm] | Database  |
|-------------------------------------------------|------------------------------------|-------------|-------------|-----------------|-------------|-----------|
| [FA (20:4)] 5Z,8Z,11Z,14Z-eicosatetraenyl amine | C <sub>20</sub> H <sub>33</sub> NO | 303.2562    | M+H         | 304.2635        | 2           | Lipidmaps |
| 5Z,8Z,11Z,14Z-eicosatetraenyl amine             | C <sub>20</sub> H <sub>33</sub> NO | 303.2562    | M+H         | 304.2635        | 2           | Lipidmaps |

#### MS search for 305.1518 m/z

| Compound                                                                      | Formula                                        | Compound MW | Adduct type | Adduct m/z calc | Delta [ppm] | Database  |
|-------------------------------------------------------------------------------|------------------------------------------------|-------------|-------------|-----------------|-------------|-----------|
| [FA hydroxy(16:3)] 8R-hydroxy-4Z,6E,10Z-hexadecatrienoic acid                 | C <sub>16</sub> H <sub>26</sub> O <sub>3</sub> | 266.1882    | M+K         | 305.1514        | 1.4         | Lipidmaps |
| [FA oxo(5:1/5:0/6:0)] (1R,2R)-3-oxo-2-(2'Z-pentenyl)cyclopentanehexanoic acid | C <sub>16</sub> H <sub>26</sub> O <sub>3</sub> | 266.1882    | M+K         | 305.1514        | 1.4         | Lipidmaps |

|                                                                               |                                                |          |     |          |     |           |
|-------------------------------------------------------------------------------|------------------------------------------------|----------|-----|----------|-----|-----------|
| [FA oxo(5:1/5:0/6:0)] (1S,2S)-3-oxo-2-(2'Z-pentenyl)cyclopentanehexanoic acid | C <sub>16</sub> H <sub>26</sub> O <sub>3</sub> | 266.1882 | M+K | 305.1514 | 1.4 | Lipidmaps |
|-------------------------------------------------------------------------------|------------------------------------------------|----------|-----|----------|-----|-----------|

**MS search for 317.1392 m/z**

| Compound                                                                                      | Formula                                        | Compound MW | Adduct type | Adduct m/z calc | Delta [ppm] | Database  |
|-----------------------------------------------------------------------------------------------|------------------------------------------------|-------------|-------------|-----------------|-------------|-----------|
| 4-Hydroxy-5,7,4'-trimethoxyflavan                                                             | C <sub>18</sub> H <sub>20</sub> O <sub>5</sub> | 316.1311    | M+H         | 317.1384        | 2.6         | Lipidmaps |
| 2-(3,5-Dimethoxyphenyl)-3,4-dihydro-7-methoxy-2H-1-benzopyran-5-ol                            | C <sub>18</sub> H <sub>20</sub> O <sub>5</sub> | 316.1311    | M+H         | 317.1384        | 2.6         | Lipidmaps |
| (2S)-4'-Hydroxy-5,7,3'-trimethoxyflavan                                                       | C <sub>18</sub> H <sub>20</sub> O <sub>5</sub> | 316.1311    | M+H         | 317.1384        | 2.6         | Lipidmaps |
| [Fv Trihydroxy, methoxy, dimethy] 4,2',6'-Trihydroxy-4'-methoxy-3',5'-dimethyldihydrochalcone | C <sub>18</sub> H <sub>20</sub> O <sub>5</sub> | 316.1311    | M+H         | 317.1384        | 2.6         | Lipidmaps |
| [Fv Hydroxy, trimethox] 2'-Hydroxy-4,4',6'-trimethoxydihydrochalcone                          | C <sub>18</sub> H <sub>20</sub> O <sub>5</sub> | 316.1311    | M+H         | 317.1384        | 2.6         | Lipidmaps |
| [Fv Hydroxy, trimethox] 2'-Hydroxy-3',4',6'-trimethoxydihydrochalcone                         | C <sub>18</sub> H <sub>20</sub> O <sub>5</sub> | 316.1311    | M+H         | 317.1384        | 2.6         | Lipidmaps |
| [Fv] Loureirin B                                                                              | C <sub>18</sub> H <sub>20</sub> O <sub>5</sub> | 316.1311    | M+H         | 317.1384        | 2.6         | Lipidmaps |
| [Fv Hydroxy, trimethox] 2-Hydroxy-3,4,6-trimethoxydihydrochalcone                             | C <sub>18</sub> H <sub>20</sub> O <sub>5</sub> | 316.1311    | M+H         | 317.1384        | 2.6         | Lipidmaps |
| [Fv Hydroxy, trimethox] 2-Hydroxy-4,5,6-trimethoxydihydrochalcone                             | C <sub>18</sub> H <sub>20</sub> O <sub>5</sub> | 316.1311    | M+H         | 317.1384        | 2.6         | Lipidmaps |

**MS search for 334.2156 m/z**

| Compound                              | Formula                                         | Compound MW | Adduct type | Adduct m/z calc | Delta [ppm] | Database  |
|---------------------------------------|-------------------------------------------------|-------------|-------------|-----------------|-------------|-----------|
| [SP (3:0)] sphinga-4E,8E,10E-trienine | C <sub>18</sub> H <sub>33</sub> NO <sub>2</sub> | 295.2511    | M+K         | 334.2143        | 3.9         | Lipidmaps |

**MS search for 337.2126 m/z**

| Compound                         | Formula                                        | Compound MW | Adduct type | Adduct m/z calc | Delta [ppm] | Database  |
|----------------------------------|------------------------------------------------|-------------|-------------|-----------------|-------------|-----------|
| 9-hydroxy-12Z-octadecenoic acid  | C <sub>18</sub> H <sub>34</sub> O <sub>3</sub> | 298.2508    | M+K         | 337.214         | -4          | Lipidmaps |
| 12-hydroxy-9E-octadecenoic acid  | C <sub>18</sub> H <sub>34</sub> O <sub>3</sub> | 298.2508    | M+K         | 337.214         | -4          | Lipidmaps |
| 12-hydroxy-10E-octadecenoic acid | C <sub>18</sub> H <sub>34</sub> O <sub>3</sub> | 298.2508    | M+K         | 337.214         | -4          | Lipidmaps |
| 9-hydroxy-10Z-octadecenoic acid  | C <sub>18</sub> H <sub>34</sub> O <sub>3</sub> | 298.2508    | M+K         | 337.214         | -4          | Lipidmaps |
| 9-hydroxy-12-octadecenoic acid   | C <sub>18</sub> H <sub>34</sub> O <sub>3</sub> | 298.2508    | M+K         | 337.214         | -4          | Lipidmaps |

|                                     |                                                |          |     |         |    |           |
|-------------------------------------|------------------------------------------------|----------|-----|---------|----|-----------|
| 17-hydroxy-9Z-octadecenoic acid     | C <sub>18</sub> H <sub>34</sub> O <sub>3</sub> | 298.2508 | M+K | 337.214 | -4 | Lipidmaps |
| 18-hydroxy-9Z-octadecenoic acid     | C <sub>18</sub> H <sub>34</sub> O <sub>3</sub> | 298.2508 | M+K | 337.214 | -4 | Lipidmaps |
| 12R-hydroxy-9Z-octadecenoic acid    | C <sub>18</sub> H <sub>34</sub> O <sub>3</sub> | 298.2508 | M+K | 337.214 | -4 | Lipidmaps |
| 5-hydroxy-2-octadecenoic acid       | C <sub>18</sub> H <sub>34</sub> O <sub>3</sub> | 298.2508 | M+K | 337.214 | -4 | Lipidmaps |
| 8-hydroxy-9-octadecenoic acid       | C <sub>18</sub> H <sub>34</sub> O <sub>3</sub> | 298.2508 | M+K | 337.214 | -4 | Lipidmaps |
| 8R-hydroxy-9Z-octadecenoic acid     | C <sub>18</sub> H <sub>34</sub> O <sub>3</sub> | 298.2508 | M+K | 337.214 | -4 | Lipidmaps |
| 9R-hydroxy-10E-octadecenoic acid    | C <sub>18</sub> H <sub>34</sub> O <sub>3</sub> | 298.2508 | M+K | 337.214 | -4 | Lipidmaps |
| 9-hydroxy-10E-octadecenoic acid     | C <sub>18</sub> H <sub>34</sub> O <sub>3</sub> | 298.2508 | M+K | 337.214 | -4 | Lipidmaps |
| 9R-hydroxy-12E-octadecenoic acid    | C <sub>18</sub> H <sub>34</sub> O <sub>3</sub> | 298.2508 | M+K | 337.214 | -4 | Lipidmaps |
| 9R-hydroxy-12Z-octadecenoic acid    | C <sub>18</sub> H <sub>34</sub> O <sub>3</sub> | 298.2508 | M+K | 337.214 | -4 | Lipidmaps |
| 10-hydroxy-8-octadecenoic acid      | C <sub>18</sub> H <sub>34</sub> O <sub>3</sub> | 298.2508 | M+K | 337.214 | -4 | Lipidmaps |
| 10R-hydroxy-8E-octadecenoic acid    | C <sub>18</sub> H <sub>34</sub> O <sub>3</sub> | 298.2508 | M+K | 337.214 | -4 | Lipidmaps |
| 11-hydroxy-9-octadecenoic acid      | C <sub>18</sub> H <sub>34</sub> O <sub>3</sub> | 298.2508 | M+K | 337.214 | -4 | Lipidmaps |
| 12R-hydroxy-9E-octadecenoic acid    | C <sub>18</sub> H <sub>34</sub> O <sub>3</sub> | 298.2508 | M+K | 337.214 | -4 | Lipidmaps |
| 12S-hydroxy-9E-octadecenoic acid    | C <sub>18</sub> H <sub>34</sub> O <sub>3</sub> | 298.2508 | M+K | 337.214 | -4 | Lipidmaps |
| 12S-hydroxy-9Z-octadecenoic acid    | C <sub>18</sub> H <sub>34</sub> O <sub>3</sub> | 298.2508 | M+K | 337.214 | -4 | Lipidmaps |
| 3-oxo-octadecanoic acid             | C <sub>18</sub> H <sub>34</sub> O <sub>3</sub> | 298.2508 | M+K | 337.214 | -4 | Lipidmaps |
| 4-oxo-octadecanoic acid             | C <sub>18</sub> H <sub>34</sub> O <sub>3</sub> | 298.2508 | M+K | 337.214 | -4 | Lipidmaps |
| 5-oxo-octadecanoic acid             | C <sub>18</sub> H <sub>34</sub> O <sub>3</sub> | 298.2508 | M+K | 337.214 | -4 | Lipidmaps |
| 6-oxo-octadecanoic acid             | C <sub>18</sub> H <sub>34</sub> O <sub>3</sub> | 298.2508 | M+K | 337.214 | -4 | Lipidmaps |
| 7-oxo-octadecanoic acid             | C <sub>18</sub> H <sub>34</sub> O <sub>3</sub> | 298.2508 | M+K | 337.214 | -4 | Lipidmaps |
| 9-oxo-octadecanoic acid             | C <sub>18</sub> H <sub>34</sub> O <sub>3</sub> | 298.2508 | M+K | 337.214 | -4 | Lipidmaps |
| 10-oxo-octadecanoic acid            | C <sub>18</sub> H <sub>34</sub> O <sub>3</sub> | 298.2508 | M+K | 337.214 | -4 | Lipidmaps |
| 16-methyl-10-oxo-heptadecanoic acid | C <sub>18</sub> H <sub>34</sub> O <sub>3</sub> | 298.2508 | M+K | 337.214 | -4 | Lipidmaps |
| 2-methyl-4-oxo-heptadecanoic acid   | C <sub>18</sub> H <sub>34</sub> O <sub>3</sub> | 298.2508 | M+K | 337.214 | -4 | Lipidmaps |
| 11-oxo-octadecanoic acid            | C <sub>18</sub> H <sub>34</sub> O <sub>3</sub> | 298.2508 | M+K | 337.214 | -4 | Lipidmaps |
| 12-oxo-octadecanoic acid            | C <sub>18</sub> H <sub>34</sub> O <sub>3</sub> | 298.2508 | M+K | 337.214 | -4 | Lipidmaps |
| 13-oxo-octadecanoic acid            | C <sub>18</sub> H <sub>34</sub> O <sub>3</sub> | 298.2508 | M+K | 337.214 | -4 | Lipidmaps |
| 14-oxo-octadecanoic acid            | C <sub>18</sub> H <sub>34</sub> O <sub>3</sub> | 298.2508 | M+K | 337.214 | -4 | Lipidmaps |
| 15-oxo-octadecanoic acid            | C <sub>18</sub> H <sub>34</sub> O <sub>3</sub> | 298.2508 | M+K | 337.214 | -4 | Lipidmaps |
| 16-oxo-octadecanoic acid            | C <sub>18</sub> H <sub>34</sub> O <sub>3</sub> | 298.2508 | M+K | 337.214 | -4 | Lipidmaps |
| 17-oxo-octadecanoic acid            | C <sub>18</sub> H <sub>34</sub> O <sub>3</sub> | 298.2508 | M+K | 337.214 | -4 | Lipidmaps |
| 2-oxo-octadecanoic acid             | C <sub>18</sub> H <sub>34</sub> O <sub>3</sub> | 298.2508 | M+K | 337.214 | -4 | Lipidmaps |
| 8-oxo-octadecanoic acid             | C <sub>18</sub> H <sub>34</sub> O <sub>3</sub> | 298.2508 | M+K | 337.214 | -4 | Lipidmaps |
| 6R,7S-epoxy-octadecanoic acid       | C <sub>18</sub> H <sub>34</sub> O <sub>3</sub> | 298.2508 | M+K | 337.214 | -4 | Lipidmaps |

|                                                     |                                                |          |     |         |    |           |
|-----------------------------------------------------|------------------------------------------------|----------|-----|---------|----|-----------|
| [FA hydroxy(18:1)] 9-hydroxy-12Z-octadecenoic acid  | C <sub>18</sub> H <sub>34</sub> O <sub>3</sub> | 298.2508 | M+K | 337.214 | -4 | Lipidmaps |
| [FA hydroxy(18:1)] 12-hydroxy-9Z-octadecenoic acid  | C <sub>18</sub> H <sub>34</sub> O <sub>3</sub> | 298.2508 | M+K | 337.214 | -4 | Lipidmaps |
| [FA hydroxy(18:1)] 12-hydroxy-9E-octadecenoic acid  | C <sub>18</sub> H <sub>34</sub> O <sub>3</sub> | 298.2508 | M+K | 337.214 | -4 | Lipidmaps |
| [FA hydroxy(18:1)] 12-hydroxy-10E-octadecenoic acid | C <sub>18</sub> H <sub>34</sub> O <sub>3</sub> | 298.2508 | M+K | 337.214 | -4 | Lipidmaps |
| [FA hydroxy(18:1)] 9-hydroxy-10Z-octadecenoic acid  | C <sub>18</sub> H <sub>34</sub> O <sub>3</sub> | 298.2508 | M+K | 337.214 | -4 | Lipidmaps |
| [FA hydroxy(18:1)] 9-hydroxy-12-octadecenoic acid   | C <sub>18</sub> H <sub>34</sub> O <sub>3</sub> | 298.2508 | M+K | 337.214 | -4 | Lipidmaps |
| [FA hydroxy(18:1)] 17-hydroxy-9Z-octadecenoic acid  | C <sub>18</sub> H <sub>34</sub> O <sub>3</sub> | 298.2508 | M+K | 337.214 | -4 | Lipidmaps |
| [FA hydroxy(18:1)] 18-hydroxy-9Z-octadecenoic acid  | C <sub>18</sub> H <sub>34</sub> O <sub>3</sub> | 298.2508 | M+K | 337.214 | -4 | Lipidmaps |
| [FA hydroxy(18:1)] 5-hydroxy-2-octadecenoic acid    | C <sub>18</sub> H <sub>34</sub> O <sub>3</sub> | 298.2508 | M+K | 337.214 | -4 | Lipidmaps |
| [FA hydroxy(18:1)] 8-hydroxy-9-octadecenoic acid    | C <sub>18</sub> H <sub>34</sub> O <sub>3</sub> | 298.2508 | M+K | 337.214 | -4 | Lipidmaps |
| [FA hydroxy(18:1)] 8R-hydroxy-9Z-octadecenoic acid  | C <sub>18</sub> H <sub>34</sub> O <sub>3</sub> | 298.2508 | M+K | 337.214 | -4 | Lipidmaps |
| [FA hydroxy(18:1)] 9R-hydroxy-10E-octadecenoic acid | C <sub>18</sub> H <sub>34</sub> O <sub>3</sub> | 298.2508 | M+K | 337.214 | -4 | Lipidmaps |
| [FA hydroxy(18:1)] 9-hydroxy-10E-octadecenoic acid  | C <sub>18</sub> H <sub>34</sub> O <sub>3</sub> | 298.2508 | M+K | 337.214 | -4 | Lipidmaps |
| [FA hydroxy(18:1)] 9R-hydroxy-12E-octadecenoic acid | C <sub>18</sub> H <sub>34</sub> O <sub>3</sub> | 298.2508 | M+K | 337.214 | -4 | Lipidmaps |
| [FA hydroxy(18:1)] 9R-hydroxy-12Z-octadecenoic acid | C <sub>18</sub> H <sub>34</sub> O <sub>3</sub> | 298.2508 | M+K | 337.214 | -4 | Lipidmaps |
| [FA hydroxy(18:1)] 10-hydroxy-8-octadecenoic acid   | C <sub>18</sub> H <sub>34</sub> O <sub>3</sub> | 298.2508 | M+K | 337.214 | -4 | Lipidmaps |
| [FA hydroxy(18:1)] 10R-hydroxy-8E-octadecenoic acid | C <sub>18</sub> H <sub>34</sub> O <sub>3</sub> | 298.2508 | M+K | 337.214 | -4 | Lipidmaps |
| [FA hydroxy(18:1)] 11-hydroxy-9-octadecenoic acid   | C <sub>18</sub> H <sub>34</sub> O <sub>3</sub> | 298.2508 | M+K | 337.214 | -4 | Lipidmaps |
| [FA hydroxy(18:1)] 12R-hydroxy-9E-octadecenoic acid | C <sub>18</sub> H <sub>34</sub> O <sub>3</sub> | 298.2508 | M+K | 337.214 | -4 | Lipidmaps |
| [FA hydroxy(18:1)] 12S-hydroxy-9E-octadecenoic acid | C <sub>18</sub> H <sub>34</sub> O <sub>3</sub> | 298.2508 | M+K | 337.214 | -4 | Lipidmaps |
| [FA hydroxy(18:1)] 12S-hydroxy-9Z-octadecenoic acid | C <sub>18</sub> H <sub>34</sub> O <sub>3</sub> | 298.2508 | M+K | 337.214 | -4 | Lipidmaps |
| 8Z-decen-4,6-diynoic acid                           | C <sub>18</sub> H <sub>34</sub> O <sub>3</sub> | 298.2508 | M+K | 337.214 | -4 | Lipidmaps |
| [FA oxo(18:0)] 4-oxo-octadecanoic acid              | C <sub>18</sub> H <sub>34</sub> O <sub>3</sub> | 298.2508 | M+K | 337.214 | -4 | Lipidmaps |
| [FA oxo(18:0)] 5-oxo-octadecanoic acid              | C <sub>18</sub> H <sub>34</sub> O <sub>3</sub> | 298.2508 | M+K | 337.214 | -4 | Lipidmaps |
| [FA oxo(18:0)] 6-oxo-octadecanoic acid              | C <sub>18</sub> H <sub>34</sub> O <sub>3</sub> | 298.2508 | M+K | 337.214 | -4 | Lipidmaps |
| [FA oxo(18:0)] 7-oxo-octadecanoic acid              | C <sub>18</sub> H <sub>34</sub> O <sub>3</sub> | 298.2508 | M+K | 337.214 | -4 | Lipidmaps |
| [FA oxo(18:0)] 9-oxo-octadecanoic acid              | C <sub>18</sub> H <sub>34</sub> O <sub>3</sub> | 298.2508 | M+K | 337.214 | -4 | Lipidmaps |

|                                                           |                                                |          |     |         |    |           |
|-----------------------------------------------------------|------------------------------------------------|----------|-----|---------|----|-----------|
| [FA oxo(18:0)] 10-oxo-octadecanoic acid                   | C <sub>18</sub> H <sub>34</sub> O <sub>3</sub> | 298.2508 | M+K | 337.214 | -4 | Lipidmaps |
| [FA methyl,oxo(17:0)] 16-methyl-10-oxo-heptadecanoic acid | C <sub>18</sub> H <sub>34</sub> O <sub>3</sub> | 298.2508 | M+K | 337.214 | -4 | Lipidmaps |
| [FA methyl,oxo(17:0)] 2-methyl-4-oxo-heptadecanoic acid   | C <sub>18</sub> H <sub>34</sub> O <sub>3</sub> | 298.2508 | M+K | 337.214 | -4 | Lipidmaps |
| [FA oxo(18:0)] 11-oxo-octadecanoic acid                   | C <sub>18</sub> H <sub>34</sub> O <sub>3</sub> | 298.2508 | M+K | 337.214 | -4 | Lipidmaps |
| [FA oxo(18:0)] 12-oxo-octadecanoic acid                   | C <sub>18</sub> H <sub>34</sub> O <sub>3</sub> | 298.2508 | M+K | 337.214 | -4 | Lipidmaps |
| [FA oxo(18:0)] 13-oxo-octadecanoic acid                   | C <sub>18</sub> H <sub>34</sub> O <sub>3</sub> | 298.2508 | M+K | 337.214 | -4 | Lipidmaps |
| [FA oxo(18:0)] 14-oxo-octadecanoic acid                   | C <sub>18</sub> H <sub>34</sub> O <sub>3</sub> | 298.2508 | M+K | 337.214 | -4 | Lipidmaps |
| [FA oxo(18:0)] 15-oxo-octadecanoic acid                   | C <sub>18</sub> H <sub>34</sub> O <sub>3</sub> | 298.2508 | M+K | 337.214 | -4 | Lipidmaps |
| [FA oxo(18:0)] 16-oxo-octadecanoic acid                   | C <sub>18</sub> H <sub>34</sub> O <sub>3</sub> | 298.2508 | M+K | 337.214 | -4 | Lipidmaps |
| [FA oxo(18:0)] 17-oxo-octadecanoic acid                   | C <sub>18</sub> H <sub>34</sub> O <sub>3</sub> | 298.2508 | M+K | 337.214 | -4 | Lipidmaps |
| [FA oxo(18:0)] 8-oxo-octadecanoic acid                    | C <sub>18</sub> H <sub>34</sub> O <sub>3</sub> | 298.2508 | M+K | 337.214 | -4 | Lipidmaps |
| [FA (18:0)] 9S,10R-epoxy-octadecanoic acid                | C <sub>18</sub> H <sub>34</sub> O <sub>3</sub> | 298.2508 | M+K | 337.214 | -4 | Lipidmaps |
| [FA (18:0)] 9R,10S-epoxy-octadecanoic acid                | C <sub>18</sub> H <sub>34</sub> O <sub>3</sub> | 298.2508 | M+K | 337.214 | -4 | Lipidmaps |
| 2R-hydroxy-oleic acid                                     | C <sub>18</sub> H <sub>34</sub> O <sub>3</sub> | 298.2508 | M+K | 337.214 | -4 | Lipidmaps |

**MS search for 363.1263 m/z**

| Compound                          | Formula                                        | Compound MW | Adduct type                     | Adduct m/z calc | Delta [ppm] | Database  |
|-----------------------------------|------------------------------------------------|-------------|---------------------------------|-----------------|-------------|-----------|
| [FA (16:1)] 7-hexadecenoic acid   | C <sub>16</sub> H <sub>30</sub> O <sub>2</sub> | 254.2246    | M+Ag <sub>10</sub> <sub>9</sub> | 363.1288        | -6.8        | Lipidmaps |
| [FA (16:1)] 10Z-hexadecenoic acid | C <sub>16</sub> H <sub>30</sub> O <sub>2</sub> | 254.2246    | M+Ag <sub>10</sub> <sub>9</sub> | 363.1288        | -6.8        | Lipidmaps |
| [FA (16:1)] 10-hexadecenoic acid  | C <sub>16</sub> H <sub>30</sub> O <sub>2</sub> | 254.2246    | M+Ag <sub>10</sub> <sub>9</sub> | 363.1288        | -6.8        | Lipidmaps |
| [FA (16:1)] 11-hexadecenoic acid  | C <sub>16</sub> H <sub>30</sub> O <sub>2</sub> | 254.2246    | M+Ag <sub>10</sub> <sub>9</sub> | 363.1288        | -6.8        | Lipidmaps |
| [FA (16:1)] 11Z-hexadecenoic acid | C <sub>16</sub> H <sub>30</sub> O <sub>2</sub> | 254.2246    | M+Ag <sub>10</sub> <sub>9</sub> | 363.1288        | -6.8        | Lipidmaps |
| [FA (16:1)] 13-hexadecenoic acid  | C <sub>16</sub> H <sub>30</sub> O <sub>2</sub> | 254.2246    | M+Ag <sub>10</sub> <sub>9</sub> | 363.1288        | -6.8        | Lipidmaps |
| [FA (16:1)] 13Z-hexadecenoic acid | C <sub>16</sub> H <sub>30</sub> O <sub>2</sub> | 254.2246    | M+Ag <sub>10</sub> <sub>9</sub> | 363.1288        | -6.8        | Lipidmaps |
| [FA (16:1)] 2Z-hexadecenoic acid  | C <sub>16</sub> H <sub>30</sub> O <sub>2</sub> | 254.2246    | M+Ag <sub>10</sub> <sub>9</sub> | 363.1288        | -6.8        | Lipidmaps |
| [FA (16:1)] 3E-hexadecenoic acid  | C <sub>16</sub> H <sub>30</sub> O <sub>2</sub> | 254.2246    | M+Ag <sub>10</sub> <sub>9</sub> | 363.1288        | -6.8        | Lipidmaps |
| [FA (16:1)] 6Z-hexadecenoic acid  | C <sub>16</sub> H <sub>30</sub> O <sub>2</sub> | 254.2246    | M+Ag <sub>10</sub> <sub>9</sub> | 363.1288        | -6.8        | Lipidmaps |
| Hexadec-7Z-enoic acid             | C <sub>16</sub> H <sub>30</sub> O <sub>2</sub> | 254.2246    | M+Ag <sub>10</sub> <sub>9</sub> | 363.1288        | -6.8        | Lipidmaps |

|                          |                                                |          |             |          |      |           |
|--------------------------|------------------------------------------------|----------|-------------|----------|------|-----------|
| 10E-Tetradecenyl acetate | C <sub>16</sub> H <sub>30</sub> O <sub>2</sub> | 254.2246 | M+Ag10<br>9 | 363.1288 | -6.8 | Lipidmaps |
| 11E-Tetradecenyl acetate | C <sub>16</sub> H <sub>30</sub> O <sub>2</sub> | 254.2246 | M+Ag10<br>9 | 363.1288 | -6.8 | Lipidmaps |
| 12E-Tetradecenyl acetate | C <sub>16</sub> H <sub>30</sub> O <sub>2</sub> | 254.2246 | M+Ag10<br>9 | 363.1288 | -6.8 | Lipidmaps |
| 3E-Tetradecenyl acetate  | C <sub>16</sub> H <sub>30</sub> O <sub>2</sub> | 254.2246 | M+Ag10<br>9 | 363.1288 | -6.8 | Lipidmaps |
| 5E-Tetradecenyl acetate  | C <sub>16</sub> H <sub>30</sub> O <sub>2</sub> | 254.2246 | M+Ag10<br>9 | 363.1288 | -6.8 | Lipidmaps |
| 6E-Tetradecenyl acetate  | C <sub>16</sub> H <sub>30</sub> O <sub>2</sub> | 254.2246 | M+Ag10<br>9 | 363.1288 | -6.8 | Lipidmaps |
| 7E-Tetradecenyl acetate  | C <sub>16</sub> H <sub>30</sub> O <sub>2</sub> | 254.2246 | M+Ag10<br>9 | 363.1288 | -6.8 | Lipidmaps |
| 8E-Tetradecenyl acetate  | C <sub>16</sub> H <sub>30</sub> O <sub>2</sub> | 254.2246 | M+Ag10<br>9 | 363.1288 | -6.8 | Lipidmaps |
| 9E-Tetradecenyl acetate  | C <sub>16</sub> H <sub>30</sub> O <sub>2</sub> | 254.2246 | M+Ag10<br>9 | 363.1288 | -6.8 | Lipidmaps |
| 10Z-Tetradecenyl acetate | C <sub>16</sub> H <sub>30</sub> O <sub>2</sub> | 254.2246 | M+Ag10<br>9 | 363.1288 | -6.8 | Lipidmaps |
| 11Z-Tetradecenyl acetate | C <sub>16</sub> H <sub>30</sub> O <sub>2</sub> | 254.2246 | M+Ag10<br>9 | 363.1288 | -6.8 | Lipidmaps |
| 12Z-Tetradecenyl acetate | C <sub>16</sub> H <sub>30</sub> O <sub>2</sub> | 254.2246 | M+Ag10<br>9 | 363.1288 | -6.8 | Lipidmaps |
| 3Z-Tetradecenyl acetate  | C <sub>16</sub> H <sub>30</sub> O <sub>2</sub> | 254.2246 | M+Ag10<br>9 | 363.1288 | -6.8 | Lipidmaps |
| 5Z-Tetradecenyl acetate  | C <sub>16</sub> H <sub>30</sub> O <sub>2</sub> | 254.2246 | M+Ag10<br>9 | 363.1288 | -6.8 | Lipidmaps |
| 6Z-Tetradecenyl acetate  | C <sub>16</sub> H <sub>30</sub> O <sub>2</sub> | 254.2246 | M+Ag10<br>9 | 363.1288 | -6.8 | Lipidmaps |
| 7Z-Tetradecenyl acetate  | C <sub>16</sub> H <sub>30</sub> O <sub>2</sub> | 254.2246 | M+Ag10<br>9 | 363.1288 | -6.8 | Lipidmaps |
| 8Z-Tetradecenyl acetate  | C <sub>16</sub> H <sub>30</sub> O <sub>2</sub> | 254.2246 | M+Ag10<br>9 | 363.1288 | -6.8 | Lipidmaps |
| 9Z-Tetradecenyl acetate  | C <sub>16</sub> H <sub>30</sub> O <sub>2</sub> | 254.2246 | M+Ag10<br>9 | 363.1288 | -6.8 | Lipidmaps |
| Ethyl 7E-tetradecenoate  | C <sub>16</sub> H <sub>30</sub> O <sub>2</sub> | 254.2246 | M+Ag10<br>9 | 363.1288 | -6.8 | Lipidmaps |
| Ethyl 9E-tetradecenoate  | C <sub>16</sub> H <sub>30</sub> O <sub>2</sub> | 254.2246 | M+Ag10<br>9 | 363.1288 | -6.8 | Lipidmaps |
| Ethyl 9Z-tetradecenoate  | C <sub>16</sub> H <sub>30</sub> O <sub>2</sub> | 254.2246 | M+Ag10<br>9 | 363.1288 | -6.8 | Lipidmaps |
| Dodecyl 2E-butenoate     | C <sub>16</sub> H <sub>30</sub> O <sub>2</sub> | 254.2246 | M+Ag10<br>9 | 363.1288 | -6.8 | Lipidmaps |
| (Z)-7-Dodecenyl butyrate | C <sub>16</sub> H <sub>30</sub> O <sub>2</sub> | 254.2246 | M+Ag10<br>9 | 363.1288 | -6.8 | Lipidmaps |
| 15R-Hexadecanolide       | C <sub>16</sub> H <sub>30</sub> O <sub>2</sub> | 254.2246 | M+Ag10<br>9 | 363.1288 | -6.8 | Lipidmaps |
| 16-Hexadecanolide        | C <sub>16</sub> H <sub>30</sub> O <sub>2</sub> | 254.2246 | M+Ag10<br>9 | 363.1288 | -6.8 | Lipidmaps |
| Delta-hexadecalactone    | C <sub>16</sub> H <sub>30</sub> O <sub>2</sub> | 254.2246 | M+Ag10<br>9 | 363.1288 | -6.8 | Lipidmaps |

MS search for 364.1466 m/z

| Compound                                   | Formula                                           | Compound MW | Adduct type | Adduct m/z calc | Delta [ppm] | Database  |
|--------------------------------------------|---------------------------------------------------|-------------|-------------|-----------------|-------------|-----------|
| [PC] 2-valeryl-sn-glycero-3-phosphocholine | C <sub>13</sub> H <sub>28</sub> NO <sub>7</sub> P | 341.1603    | M+Na        | 364.1496        | -8.1        | Lipidmaps |

MS search for 365.1445 m/z

| Compound                                                  | Formula                                        | Compound MW | Adduct type                     | Adduct m/z calc | Delta [ppm] | Database  |
|-----------------------------------------------------------|------------------------------------------------|-------------|---------------------------------|-----------------|-------------|-----------|
| [FA (15:0)] 14-methyl-pentadecanoic acid                  | C <sub>16</sub> H <sub>32</sub> O <sub>2</sub> | 256.2402    | M+Ag <sub>10</sub> <sub>9</sub> | 365.1444        | 0.2         | Lipidmaps |
| [FA dimethyl(14:0)] 2,6-dimethyl-tetradecanoic acid       | C <sub>16</sub> H <sub>32</sub> O <sub>2</sub> | 256.2402    | M+Ag <sub>10</sub> <sub>9</sub> | 365.1444        | 0.2         | Lipidmaps |
| [FA dimethyl(14:0)] 2,8-dimethyl-tetradecanoic acid       | C <sub>16</sub> H <sub>32</sub> O <sub>2</sub> | 256.2402    | M+Ag <sub>10</sub> <sub>9</sub> | 365.1444        | 0.2         | Lipidmaps |
| [FA methyl(15:0)] 3-methyl-pentadecanoic acid             | C <sub>16</sub> H <sub>32</sub> O <sub>2</sub> | 256.2402    | M+Ag <sub>10</sub> <sub>9</sub> | 365.1444        | 0.2         | Lipidmaps |
| [FA (3:2/13:0)] 2-propyl-tridecanoic acid                 | C <sub>16</sub> H <sub>32</sub> O <sub>2</sub> | 256.2402    | M+Ag <sub>10</sub> <sub>9</sub> | 365.1444        | 0.2         | Lipidmaps |
| [FA (6:2/10:0)] 2-hexyl-decanoic acid                     | C <sub>16</sub> H <sub>32</sub> O <sub>2</sub> | 256.2402    | M+Ag <sub>10</sub> <sub>9</sub> | 365.1444        | 0.2         | Lipidmaps |
| [FA ethyl,methyl(13:0)] 3-ethyl-3-methyl-tridecanoic acid | C <sub>16</sub> H <sub>32</sub> O <sub>2</sub> | 256.2402    | M+Ag <sub>10</sub> <sub>9</sub> | 365.1444        | 0.2         | Lipidmaps |
| [FA (7:2/9:0)] 2-heptyl-nonanoic acid                     | C <sub>16</sub> H <sub>32</sub> O <sub>2</sub> | 256.2402    | M+Ag <sub>10</sub> <sub>9</sub> | 365.1444        | 0.2         | Lipidmaps |
| [FA ethyl(14:0)] 6-ethyl-tetradecanoic acid               | C <sub>16</sub> H <sub>32</sub> O <sub>2</sub> | 256.2402    | M+Ag <sub>10</sub> <sub>9</sub> | 365.1444        | 0.2         | Lipidmaps |
| [FA dimethyl(14:0)] 2,4-dimethyl-tetradecanoic acid       | C <sub>16</sub> H <sub>32</sub> O <sub>2</sub> | 256.2402    | M+Ag <sub>10</sub> <sub>9</sub> | 365.1444        | 0.2         | Lipidmaps |
| [FA dimethyl(14:0)] 3,5-dimethyl-tetradecanoic acid       | C <sub>16</sub> H <sub>32</sub> O <sub>2</sub> | 256.2402    | M+Ag <sub>10</sub> <sub>9</sub> | 365.1444        | 0.2         | Lipidmaps |
| [FA (6:2/10:0)] 4-hexyl-decanoic acid                     | C <sub>16</sub> H <sub>32</sub> O <sub>2</sub> | 256.2402    | M+Ag <sub>10</sub> <sub>9</sub> | 365.1444        | 0.2         | Lipidmaps |
| [FA ethyl(4:2/10:0)] 2-ethyl-2-butyl-decanoic acid        | C <sub>16</sub> H <sub>32</sub> O <sub>2</sub> | 256.2402    | M+Ag <sub>10</sub> <sub>9</sub> | 365.1444        | 0.2         | Lipidmaps |
| [FA methyl(15:0)] 13-methyl-pentadecanoic acid            | C <sub>16</sub> H <sub>32</sub> O <sub>2</sub> | 256.2402    | M+Ag <sub>10</sub> <sub>9</sub> | 365.1444        | 0.2         | Lipidmaps |
| 13,13-dimethyl-tetradecanoic acid                         | C <sub>16</sub> H <sub>32</sub> O <sub>2</sub> | 256.2402    | M+Ag <sub>10</sub> <sub>9</sub> | 365.1444        | 0.2         | Lipidmaps |
| 14:0(10Me,13Me)                                           | C <sub>16</sub> H <sub>32</sub> O <sub>2</sub> | 256.2402    | M+Ag <sub>10</sub> <sub>9</sub> | 365.1444        | 0.2         | Lipidmaps |
| 2-hydroxyhexadecanal                                      | C <sub>16</sub> H <sub>32</sub> O <sub>2</sub> | 256.2402    | M+Ag <sub>10</sub> <sub>9</sub> | 365.1444        | 0.2         | Lipidmaps |
| Tetradecyl acetate                                        | C <sub>16</sub> H <sub>32</sub> O <sub>2</sub> | 256.2402    | M+Ag <sub>10</sub> <sub>9</sub> | 365.1444        | 0.2         | Lipidmaps |
| Dodecyl butyrate                                          | C <sub>16</sub> H <sub>32</sub> O <sub>2</sub> | 256.2402    | M+Ag <sub>10</sub> <sub>9</sub> | 365.1444        | 0.2         | Lipidmaps |
| Decyl hexanoate                                           | C <sub>16</sub> H <sub>32</sub> O <sub>2</sub> | 256.2402    | M+Ag <sub>10</sub> <sub>9</sub> | 365.1444        | 0.2         | Lipidmaps |
| Octyl octanoate                                           | C <sub>16</sub> H <sub>32</sub> O <sub>2</sub> | 256.2402    | M+Ag <sub>10</sub> <sub>9</sub> | 365.1444        | 0.2         | Lipidmaps |
| Hexyl decanoate                                           | C <sub>16</sub> H <sub>32</sub> O <sub>2</sub> | 256.2402    | M+Ag <sub>10</sub> <sub>9</sub> | 365.1444        | 0.2         | Lipidmaps |

|                                     |                                                |          |                                 |          |     |           |
|-------------------------------------|------------------------------------------------|----------|---------------------------------|----------|-----|-----------|
| Ethyl tetradecanoate                | C <sub>16</sub> H <sub>32</sub> O <sub>2</sub> | 256.2402 | M+Ag <sup>10</sup> <sub>9</sub> | 365.1444 | 0.2 | Lipidmaps |
| Formyl 2,6,10-trimethyl-dodecanoate | C <sub>16</sub> H <sub>32</sub> O <sub>2</sub> | 256.2402 | M+Ag <sup>10</sup> <sub>9</sub> | 365.1444 | 0.2 | Lipidmaps |
| 7-Methyloctyl 5-methylhexanoate     | C <sub>16</sub> H <sub>32</sub> O <sub>2</sub> | 256.2402 | M+Ag <sup>10</sup> <sub>9</sub> | 365.1444 | 0.2 | Lipidmaps |

#### MS search for 392.1792 *m/z*

| Compound                                           | Formula                                           | Compound MW | Adduct type | Adduct <i>m/z</i> calc | Delta [ppm] | Database  |
|----------------------------------------------------|---------------------------------------------------|-------------|-------------|------------------------|-------------|-----------|
| PC(7:0/0:0)                                        | C <sub>15</sub> H <sub>32</sub> NO <sub>7</sub> P | 369.1916    | M+Na        | 392.1809               | -4.2        | Lipidmaps |
| [PC (7:0)] 1-heptanoyl-sn-glycero-3-phosphocholine | C <sub>15</sub> H <sub>32</sub> NO <sub>7</sub> P | 369.1916    | M+Na        | 392.1809               | -4.2        | Lipidmaps |
| PC(0:0/7:0)                                        | C <sub>15</sub> H <sub>32</sub> NO <sub>7</sub> P | 369.1916    | M+Na        | 392.1809               | -4.2        | Lipidmaps |
| [PC (7:0)] 2-heptanoyl-sn-glycero-3-phosphocholine | C <sub>15</sub> H <sub>32</sub> NO <sub>7</sub> P | 369.1916    | M+Na        | 392.1809               | -4.2        | Lipidmaps |

#### MS search for 419.2934 *m/z*

| Compound                                                                              | Formula                                        | Compound MW | Adduct type | Adduct <i>m/z</i> calc | Delta [ppm] | Database  |
|---------------------------------------------------------------------------------------|------------------------------------------------|-------------|-------------|------------------------|-------------|-----------|
| [FA oxo(24:0)] 15-oxo-18Z-tetracosenoic acid                                          | C <sub>24</sub> H <sub>44</sub> O <sub>3</sub> | 380.329     | M+K         | 419.2922               | 2.8         | Lipidmaps |
| [ST (5:0/2:0)] (5Z,7E,23E)-(3S)-9,10-seco-5,7,10(19),16,23-cholestapentaene-3,25-diol | C <sub>27</sub> H <sub>40</sub> O <sub>2</sub> | 396.3028    | M+Na        | 419.292                | 3.2         | Lipidmaps |
| [ST (5:0/2:0)] (5Z,7E,23Z)-(3S)-9,10-seco-5,7,10(19),16,23-cholestapentaene-3,25-diol | C <sub>27</sub> H <sub>40</sub> O <sub>2</sub> | 396.3028    | M+Na        | 419.292                | 3.2         | Lipidmaps |
| [ST (2:0/2:0/2:0)] (5Z,7E)-(3S)-9,10-seco-5,7,10(19)-cholestatrien-23-yne-3,25-diol   | C <sub>27</sub> H <sub>40</sub> O <sub>2</sub> | 396.3028    | M+Na        | 419.292                | 3.2         | Lipidmaps |
| [ST hydroxy(4:0)] (22E)-(8S)-3-hydroxy-9,10-seco-1,3,5(10),22-cholestetraen-9-one     | C <sub>27</sub> H <sub>40</sub> O <sub>2</sub> | 396.3028    | M+Na        | 419.292                | 3.2         | Lipidmaps |

#### MS search for 447.2651 *m/z*

| Compound                                            | Formula                                        | Compound MW | Adduct type | Adduct <i>m/z</i> calc | Delta [ppm] | Database  |
|-----------------------------------------------------|------------------------------------------------|-------------|-------------|------------------------|-------------|-----------|
| 4Z,7Z,10Z,13Z,16Z,19Z,22Z,25Z-octacosaoctanoic acid | C <sub>28</sub> H <sub>40</sub> O <sub>2</sub> | 408.3028    | M+K         | 447.266                | -2          | Lipidmaps |

#### MS search for 449.2477 *m/z*

| Compound                                                                                                     | Formula                                        | Compound MW | Adduct type | Adduct <i>m/z</i> calc | Delta [ppm] | Database  |
|--------------------------------------------------------------------------------------------------------------|------------------------------------------------|-------------|-------------|------------------------|-------------|-----------|
| [ST hydroxy(4:0)] (5Z,7E,22E)-(1S,3R)-1,3-dihydroxy-26,27-cyclo-9,10-seco-5,7,10(19),22-cholestetraen-24-one | C <sub>27</sub> H <sub>38</sub> O <sub>3</sub> | 410.2821    | M+K         | 449.2453               | 5.4         | Lipidmaps |

|                                                                                                       |                                                |          |      |          |      |           |
|-------------------------------------------------------------------------------------------------------|------------------------------------------------|----------|------|----------|------|-----------|
| [ST (2:0/2:0/2:0)] (5Z,7E)-(1S,3R)-24,25-epoxy-9,10-seco-5,7,10(19)-cholestatrien-22-yne-1,3-diol     | C <sub>27</sub> H <sub>38</sub> O <sub>3</sub> | 410.2821 | M+K  | 449.2453 | 5.4  | Lipidmaps |
| [ST (2:0/2:0/2:0)] (5Z,7E)-(1S,3R)-25,26-epoxy-9,10-seco-5,7,10(19)-cholestatrien-23-yne-1,3-diol     | C <sub>27</sub> H <sub>38</sub> O <sub>3</sub> | 410.2821 | M+K  | 449.2453 | 5.4  | Lipidmaps |
| [ST (2:0/2:0/2:0)] (5Z,7E)-(1S,3R,20S)-25,26-epoxy-9,10-seco-5,7,10(19)-cholestatrien-23-yne-1,3-diol | C <sub>27</sub> H <sub>38</sub> O <sub>3</sub> | 410.2821 | M+K  | 449.2453 | 5.4  | Lipidmaps |
| [ST (4:0/3:0)] (5Z,7E)-(1S,3R)-9,10-seco-5,7,10(19),16-cholestetraen-23-yne-1,3,25-triol              | C <sub>27</sub> H <sub>38</sub> O <sub>3</sub> | 410.2821 | M+K  | 449.2453 | 5.4  | Lipidmaps |
| [FA hydroxy,oxo(2:0)] 9S,15S-dihydroxy-11-oxo-5Z,13E-prostadienoic acid 2-glyceryl ester              | C <sub>23</sub> H <sub>38</sub> O <sub>7</sub> | 426.2618 | M+Na | 449.251  | -7.3 | Lipidmaps |
| [FA hydroxy,oxo(2:0)] 9S,15S-dihydroxy-11-oxo-5Z,13E-prostadienoic acid 1(3)-glyceryl ester           | C <sub>23</sub> H <sub>38</sub> O <sub>7</sub> | 426.2618 | M+Na | 449.251  | -7.3 | Lipidmaps |
| [FA oxo,hydroxy(2:0)] 9-oxo-11R,15S-dihydroxy-5Z,13E-prostadienoic acid 2-glyceryl ester              | C <sub>23</sub> H <sub>38</sub> O <sub>7</sub> | 426.2618 | M+Na | 449.251  | -7.3 | Lipidmaps |
| [FA oxo,hydroxy(2:0)] 9-oxo-11R,15S-dihydroxy-5Z,13E-prostadienoic acid 1(3)-glyceryl ester           | C <sub>23</sub> H <sub>38</sub> O <sub>7</sub> | 426.2618 | M+Na | 449.251  | -7.3 | Lipidmaps |
| [FA hydroxy(2:0)] 9S,11R-epidioxy-15S-hydroxy-5Z,13E-prostadienoic acid 2-glyceryl ester              | C <sub>23</sub> H <sub>38</sub> O <sub>7</sub> | 426.2618 | M+Na | 449.251  | -7.3 | Lipidmaps |
| [FA hydroxy(2:0)] 9S,11R-epidioxy-15S-hydroxy-5Z,13E-prostadienoic acid 1(3)-glyceryl ester           | C <sub>23</sub> H <sub>38</sub> O <sub>7</sub> | 426.2618 | M+Na | 449.251  | -7.3 | Lipidmaps |

**MS search for 453.2299 m/z**

| Compound                                                                             | Formula                                        | Compound MW | Adduct type | Adduct m/z calc | Delta [ppm] | Database  |
|--------------------------------------------------------------------------------------|------------------------------------------------|-------------|-------------|-----------------|-------------|-----------|
| [Fv] Kushenol D                                                                      | C <sub>27</sub> H <sub>32</sub> O <sub>6</sub> | 452.2199    | M+H         | 453.2272        | 6           | Lipidmaps |
| [Fv hydroxy,dimethoxy(9:1)] (2S)-7,4'-Dihydroxy-8-lavandulyl-5,2'-dimethoxyflavanone | C <sub>27</sub> H <sub>32</sub> O <sub>6</sub> | 452.2199    | M+H         | 453.2272        | 6           | Lipidmaps |
| [Fv] Amoradinin                                                                      | C <sub>27</sub> H <sub>32</sub> O <sub>6</sub> | 452.2199    | M+H         | 453.2272        | 6           | Lipidmaps |

**MS search for 478.2714 m/z**

| Compound | Formula | Compound MW | Adduct type | Adduct m/z calc | Delta [ppm] | Database |
|----------|---------|-------------|-------------|-----------------|-------------|----------|
|----------|---------|-------------|-------------|-----------------|-------------|----------|

|                                                                  |                                                   |          |     |          |     |           |
|------------------------------------------------------------------|---------------------------------------------------|----------|-----|----------|-----|-----------|
| PC(O-12:0/O-1:0)                                                 | C <sub>21</sub> H <sub>46</sub> NO <sub>6</sub> P | 439.3063 | M+K | 478.2694 | 4.1 | Lipidmaps |
| [PC methyl(12:2)] 1-dodecyl-2-methyl-sn-glycero-3-phosphocholine | C <sub>21</sub> H <sub>46</sub> NO <sub>6</sub> P | 439.3063 | M+K | 478.2694 | 4.1 | Lipidmaps |
| [PE (16:2)] 1-hexadecyl-sn-glycero-3-phosphoethanolamine         | C <sub>21</sub> H <sub>46</sub> NO <sub>6</sub> P | 439.3063 | M+K | 478.2694 | 4.1 | Lipidmaps |

**MS search for 503.282 m/z**

| Compound                          | Formula                                        | Compound MW | Adduct type                     | Adduct m/z calc | Delta [ppm] | Database  |
|-----------------------------------|------------------------------------------------|-------------|---------------------------------|-----------------|-------------|-----------|
| [FA (26:0)] 9-hexacosenoic acid   | C <sub>26</sub> H <sub>50</sub> O <sub>2</sub> | 394.3811    | M+Ag <sub>10</sub> <sub>9</sub> | 503.2853        | -6.5        | Lipidmaps |
| [FA (26:0)] 17Z-hexacosenoic acid | C <sub>26</sub> H <sub>50</sub> O <sub>2</sub> | 394.3811    | M+Ag <sub>10</sub> <sub>9</sub> | 503.2853        | -6.5        | Lipidmaps |
| [FA (26:0)] 17-hexacosenoic acid  | C <sub>26</sub> H <sub>50</sub> O <sub>2</sub> | 394.3811    | M+Ag <sub>10</sub> <sub>9</sub> | 503.2853        | -6.5        | Lipidmaps |
| [FA (26:0)] 9Z-hexacosenoic acid  | C <sub>26</sub> H <sub>50</sub> O <sub>2</sub> | 394.3811    | M+Ag <sub>10</sub> <sub>9</sub> | 503.2853        | -6.5        | Lipidmaps |
| Lauryl myristoleate               | C <sub>26</sub> H <sub>50</sub> O <sub>2</sub> | 394.3811    | M+Ag <sub>10</sub> <sub>9</sub> | 503.2853        | -6.5        | Lipidmaps |
| Myristoleyl laurate               | C <sub>26</sub> H <sub>50</sub> O <sub>2</sub> | 394.3811    | M+Ag <sub>10</sub> <sub>9</sub> | 503.2853        | -6.5        | Lipidmaps |
| 4-Methyl-3-heptyl oleate          | C <sub>26</sub> H <sub>50</sub> O <sub>2</sub> | 394.3811    | M+Ag <sub>10</sub> <sub>9</sub> | 503.2853        | -6.5        | Lipidmaps |
| 26-Hexacosanolide                 | C <sub>26</sub> H <sub>50</sub> O <sub>2</sub> | 394.3811    | M+Ag <sub>10</sub> <sub>9</sub> | 503.2853        | -6.5        | Lipidmaps |
| 22:1(5Z)(9Me,13Me,17Me,21Me)      | C <sub>26</sub> H <sub>50</sub> O <sub>2</sub> | 394.3811    | M+Ag <sub>10</sub> <sub>9</sub> | 503.2853        | -6.5        | Lipidmaps |

**MS search for 559.3414 m/z**

| Compound      | Formula                                          | Compound MW | Adduct type | Adduct m/z calc | Delta [ppm] | Database  |
|---------------|--------------------------------------------------|-------------|-------------|-----------------|-------------|-----------|
| PA(12:0/12:0) | C <sub>27</sub> H <sub>53</sub> O <sub>8</sub> P | 536.3478    | M+Na        | 559.337         | 7.8         | Lipidmaps |

**MS search for 569.3915 m/z**

| Compound                           | Formula                                        | Compound MW | Adduct type | Adduct m/z calc | Delta [ppm] | Database  |
|------------------------------------|------------------------------------------------|-------------|-------------|-----------------|-------------|-----------|
| 3-Hexaprenyl-4-hydroxybenzoic acid | C <sub>37</sub> H <sub>54</sub> O <sub>3</sub> | 546.4073    | M+Na        | 569.3965        | -8.8        | Lipidmaps |

**MS search for 608.4593 m/z**

| Compound                                                | Formula                                           | Compound MW | Adduct type | Adduct m/z calc | Delta [ppm] | Database  |
|---------------------------------------------------------|---------------------------------------------------|-------------|-------------|-----------------|-------------|-----------|
| [PC (24:0)] 1-tetracosanoyl-sn-glycero-3-phosphocholine | C <sub>32</sub> H <sub>66</sub> NO <sub>7</sub> P | 607.4577    | M+H         | 608.465         | -9.3        | Lipidmaps |

**MS search for 615.4225 m/z**

| Compound                                                             | Formula                                        | Compound MW | Adduct type | Adduct <i>m/z</i> calc | Delta [ppm] | Database  |
|----------------------------------------------------------------------|------------------------------------------------|-------------|-------------|------------------------|-------------|-----------|
| [FA (26:0/2:0)] 1-(O-alpha-D-glucopyranosyl)-(3R,25R)-hexacosanediol | C <sub>32</sub> H <sub>64</sub> O <sub>8</sub> | 576.4601    | M+K         | 615.4233               | -1.3        | Lipidmaps |
| [FA (26:0/2:0)] 1-(O-alpha-D-glucopyranosyl)-(3S,25R)-hexacosanediol | C <sub>32</sub> H <sub>64</sub> O <sub>8</sub> | 576.4601    | M+K         | 615.4233               | -1.3        | Lipidmaps |

MS search for 643.4271 *m/z*

| Compound                  | Formula                                          | Compound MW | Adduct type | Adduct <i>m/z</i> calc | Delta [ppm] | Database  |
|---------------------------|--------------------------------------------------|-------------|-------------|------------------------|-------------|-----------|
| PA(18:0/12:0)             | C <sub>33</sub> H <sub>65</sub> O <sub>8</sub> P | 620.4417    | M+Na        | 643.4309               | -6          | Lipidmaps |
| PA(17:0/13:0)             | C <sub>33</sub> H <sub>65</sub> O <sub>8</sub> P | 620.4417    | M+Na        | 643.4309               | -6          | Lipidmaps |
| PA(13:0/17:0)             | C <sub>33</sub> H <sub>65</sub> O <sub>8</sub> P | 620.4417    | M+Na        | 643.4309               | -6          | Lipidmaps |
| PA(12:0/18:0)             | C <sub>33</sub> H <sub>65</sub> O <sub>8</sub> P | 620.4417    | M+Na        | 643.4309               | -6          | Lipidmaps |
| PA(16:0/14:0)             | C <sub>33</sub> H <sub>65</sub> O <sub>8</sub> P | 620.4417    | M+Na        | 643.4309               | -6          | Lipidmaps |
| PA(15:0/15:0)             | C <sub>33</sub> H <sub>65</sub> O <sub>8</sub> P | 620.4417    | M+Na        | 643.4309               | -6          | Lipidmaps |
| PA(14:0/16:0)             | C <sub>33</sub> H <sub>65</sub> O <sub>8</sub> P | 620.4417    | M+Na        | 643.4309               | -6          | Lipidmaps |
| PA(30:0)                  | C <sub>33</sub> H <sub>65</sub> O <sub>8</sub> P | 620.4417    | M+Na        | 643.4309               | -6          |           |
| PA(12:0/20:3(8Z,11Z,14Z)) | C <sub>35</sub> H <sub>63</sub> O <sub>8</sub> P | 642.4261    | M+H         | 643.4333               | -9.7        | Lipidmaps |
| PA(14:0/18:3(6Z,9Z,12Z))  | C <sub>35</sub> H <sub>63</sub> O <sub>8</sub> P | 642.4261    | M+H         | 643.4333               | -9.7        | Lipidmaps |
| PA(14:1(9Z)/18:2(9Z,12Z)) | C <sub>35</sub> H <sub>63</sub> O <sub>8</sub> P | 642.4261    | M+H         | 643.4333               | -9.7        | Lipidmaps |
| PA(15:1(9Z)/17:2(9Z,12Z)) | C <sub>35</sub> H <sub>63</sub> O <sub>8</sub> P | 642.4261    | M+H         | 643.4333               | -9.7        | Lipidmaps |
| PA(17:2(9Z,12Z)/15:1(9Z)) | C <sub>35</sub> H <sub>63</sub> O <sub>8</sub> P | 642.4261    | M+H         | 643.4333               | -9.7        | Lipidmaps |
| PA(18:2(9Z,12Z)/14:1(9Z)) | C <sub>35</sub> H <sub>63</sub> O <sub>8</sub> P | 642.4261    | M+H         | 643.4333               | -9.7        | Lipidmaps |
| PA(18:3(6Z,9Z,12Z)/14:0)  | C <sub>35</sub> H <sub>63</sub> O <sub>8</sub> P | 642.4261    | M+H         | 643.4333               | -9.7        | Lipidmaps |
| PA(18:3(9Z,12Z,15Z)/14:0) | C <sub>35</sub> H <sub>63</sub> O <sub>8</sub> P | 642.4261    | M+H         | 643.4333               | -9.7        | Lipidmaps |
| PA(20:3(8Z,11Z,14Z)/12:0) | C <sub>35</sub> H <sub>63</sub> O <sub>8</sub> P | 642.4261    | M+H         | 643.4333               | -9.7        | Lipidmaps |
| PA(14:0/18:3(9Z,12Z,15Z)) | C <sub>35</sub> H <sub>63</sub> O <sub>8</sub> P | 642.4261    | M+H         | 643.4333               | -9.7        | Lipidmaps |
| PA(32:3)                  | C <sub>35</sub> H <sub>63</sub> O <sub>8</sub> P | 642.4261    | M+H         | 643.4333               | -9.7        | Lipidmaps |

MS search for 645.5618 *m/z*

| Compound                                                                        | Formula                                        | Compound MW | Adduct type | Adduct <i>m/z</i> calc | Delta [ppm] | Database  |
|---------------------------------------------------------------------------------|------------------------------------------------|-------------|-------------|------------------------|-------------|-----------|
| Stigmast-5,22E-dien-3beta-yl (7Z,10Z,13Z-hexadecatrienoate)                     | C <sub>45</sub> H <sub>72</sub> O <sub>2</sub> | 644.5532    | M+H         | 645.5605               | 2           | Lipidmaps |
| [ST (16:0)] (5Z,7E)-(3S)-9,10-seco-5,7,10(19)-cholestatriene-3-yl hexadecanoate | C <sub>43</sub> H <sub>74</sub> O <sub>2</sub> | 622.5689    | M+Na        | 645.5581               | 5.7         | Lipidmaps |
| Cholest-5-en-3β-yl (7Z-hexadecenoate)                                           | C <sub>43</sub> H <sub>74</sub> O <sub>2</sub> | 622.5689    | M+Na        | 645.5581               | 5.7         | Lipidmaps |

MS search for 675.5169 *m/z*

| Compound | Formula | Compound MW | Adduct type | Adduct <i>m/z</i> calc | Delta [ppm] | Database |
|----------|---------|-------------|-------------|------------------------|-------------|----------|
|----------|---------|-------------|-------------|------------------------|-------------|----------|

|                                                                                    |                                                |          |     |          |     |           |
|------------------------------------------------------------------------------------|------------------------------------------------|----------|-----|----------|-----|-----------|
|                                                                                    |                                                |          |     |          | ]   |           |
| [GL (8:0/8:0)] 1-(8-[3]-ladderane-octanyl)-2-(8-[3]-ladderane-octanyl)-sn-glycerol | C <sub>43</sub> H <sub>72</sub> O <sub>3</sub> | 636.5482 | M+K | 675.5113 | 8.3 | Lipidmaps |

MS search for 688.3903 m/z

| Compound          | Formula                                           | Compound MW | Adduct type | Adduct m/z calc | Delta [ppm] | Database  |
|-------------------|---------------------------------------------------|-------------|-------------|-----------------|-------------|-----------|
| PC(16:0/9:0(CHO)) | C <sub>33</sub> H <sub>64</sub> NO <sub>9</sub> P | 649.4319    | M+K         | 688.395         | -6.9        | Lipidmaps |

MS search for 699.4998 m/z

| Compound                   | Formula                                          | Compound MW | Adduct type                     | Adduct m/z calc | Delta [ppm] | Database  |
|----------------------------|--------------------------------------------------|-------------|---------------------------------|-----------------|-------------|-----------|
| PA(14:1(9Z)/22:2(13Z,16Z)) | C <sub>39</sub> H <sub>71</sub> O <sub>8</sub> P | 698.4887    | M+H                             | 699.4959        | 5.5         | Lipidmaps |
| PA(16:1(9Z)/20:2(11Z,14Z)) | C <sub>39</sub> H <sub>71</sub> O <sub>8</sub> P | 698.4887    | M+H                             | 699.4959        | 5.5         | Lipidmaps |
| PA(17:2(9Z,12Z)/19:1(9Z))  | C <sub>39</sub> H <sub>71</sub> O <sub>8</sub> P | 698.4887    | M+H                             | 699.4959        | 5.5         | Lipidmaps |
| PA(18:0/18:3(6Z,9Z,12Z))   | C <sub>39</sub> H <sub>71</sub> O <sub>8</sub> P | 698.4887    | M+H                             | 699.4959        | 5.5         | Lipidmaps |
| PA(18:0/18:3(9Z,12Z,15Z))  | C <sub>39</sub> H <sub>71</sub> O <sub>8</sub> P | 698.4887    | M+H                             | 699.4959        | 5.5         | Lipidmaps |
| PA(18:2(9Z,12Z)/18:1(9Z))  | C <sub>39</sub> H <sub>71</sub> O <sub>8</sub> P | 698.4887    | M+H                             | 699.4959        | 5.5         | Lipidmaps |
| PA(18:3(6Z,9Z,12Z)/18:0)   | C <sub>39</sub> H <sub>71</sub> O <sub>8</sub> P | 698.4887    | M+H                             | 699.4959        | 5.5         | Lipidmaps |
| PA(18:3(9Z,12Z,15Z)/18:0)  | C <sub>39</sub> H <sub>71</sub> O <sub>8</sub> P | 698.4887    | M+H                             | 699.4959        | 5.5         | Lipidmaps |
| PA(19:1(9Z)/17:2(9Z,12Z))  | C <sub>39</sub> H <sub>71</sub> O <sub>8</sub> P | 698.4887    | M+H                             | 699.4959        | 5.5         | Lipidmaps |
| PA(20:2(11Z,14Z)/16:1(9Z)) | C <sub>39</sub> H <sub>71</sub> O <sub>8</sub> P | 698.4887    | M+H                             | 699.4959        | 5.5         | Lipidmaps |
| PA(20:3(8Z,11Z,14Z)/16:0)  | C <sub>39</sub> H <sub>71</sub> O <sub>8</sub> P | 698.4887    | M+H                             | 699.4959        | 5.5         | Lipidmaps |
| PA(22:2(13Z,16Z)/14:1(9Z)) | C <sub>39</sub> H <sub>71</sub> O <sub>8</sub> P | 698.4887    | M+H                             | 699.4959        | 5.5         | Lipidmaps |
| PA(16:0/20:3(8Z,11Z,14Z))  | C <sub>39</sub> H <sub>71</sub> O <sub>8</sub> P | 698.4887    | M+H                             | 699.4959        | 5.5         | Lipidmaps |
| PA(18:1(9Z)/18:2(9Z,12Z))  | C <sub>39</sub> H <sub>71</sub> O <sub>8</sub> P | 698.4887    | M+H                             | 699.4959        | 5.5         | Lipidmaps |
| PA(36:3)                   | C <sub>39</sub> H <sub>71</sub> O <sub>8</sub> P | 698.4887    | M+H                             | 699.4959        | 5.5         | Lipidmaps |
| Tetracosanyl palmitoleate  | C <sub>40</sub> H <sub>78</sub> O <sub>2</sub>   | 590.6002    | M+Ag <sub>10</sub> <sup>9</sup> | 699.5044        | -6.5        | Lipidmaps |

MS search for 701.5125 m/z

| Compound               | Formula                                          | Compound MW | Adduct type | Adduct m/z calc | Delta [ppm] | Database  |
|------------------------|--------------------------------------------------|-------------|-------------|-----------------|-------------|-----------|
| PA(14:0/22:2(13Z,16Z)) | C <sub>39</sub> H <sub>73</sub> O <sub>8</sub> P | 700.5043    | M+H         | 701.5116        | 1.3         | Lipidmaps |
| PA(14:1(9Z)/22:1(11Z)) | C <sub>39</sub> H <sub>73</sub> O <sub>8</sub> P | 700.5043    | M+H         | 701.5116        | 1.3         | Lipidmaps |
| PA(16:0/20:2(11Z,14Z)) | C <sub>39</sub> H <sub>73</sub> O <sub>8</sub> P | 700.5043    | M+H         | 701.5116        | 1.3         | Lipidmaps |
| PA(16:1(9Z)/20:1(11Z)) | C <sub>39</sub> H <sub>73</sub> O <sub>8</sub> P | 700.5043    | M+H         | 701.5116        | 1.3         | Lipidmaps |
| PA(17:1(9Z)/19:1(9Z))  | C <sub>39</sub> H <sub>73</sub> O <sub>8</sub> P | 700.5043    | M+H         | 701.5116        | 1.3         | Lipidmaps |
| PA(17:2(9Z,12Z)/19:0)  | C <sub>39</sub> H <sub>73</sub> O <sub>8</sub> P | 700.5043    | M+H         | 701.5116        | 1.3         | Lipidmaps |
| PA(19:0/17:2(9Z,12Z))  | C <sub>39</sub> H <sub>73</sub> O <sub>8</sub> P | 700.5043    | M+H         | 701.5116        | 1.3         | Lipidmaps |
| PA(19:1(9Z)/17:1(9Z))  | C <sub>39</sub> H <sub>73</sub> O <sub>8</sub> P | 700.5043    | M+H         | 701.5116        | 1.3         | Lipidmaps |
| PA(20:1(11Z)/16:1(9Z)) | C <sub>39</sub> H <sub>73</sub> O <sub>8</sub> P | 700.5043    | M+H         | 701.5116        | 1.3         | Lipidmaps |
| PA(20:2(11Z,14Z)/16:0) | C <sub>39</sub> H <sub>73</sub> O <sub>8</sub> P | 700.5043    | M+H         | 701.5116        | 1.3         | Lipidmaps |

|                        |                                                  |          |     |          |     |           |
|------------------------|--------------------------------------------------|----------|-----|----------|-----|-----------|
| PA(22:1(11Z)/14:1(9Z)) | C <sub>39</sub> H <sub>73</sub> O <sub>8</sub> P | 700.5043 | M+H | 701.5116 | 1.3 | Lipidmaps |
| PA(22:2(13Z,16Z)/14:0) | C <sub>39</sub> H <sub>73</sub> O <sub>8</sub> P | 700.5043 | M+H | 701.5116 | 1.3 | Lipidmaps |
| PA(18:2(9Z,12Z)/18:0)  | C <sub>39</sub> H <sub>73</sub> O <sub>8</sub> P | 700.5043 | M+H | 701.5116 | 1.3 | Lipidmaps |
| PA(36:2)               | C <sub>39</sub> H <sub>73</sub> O <sub>8</sub> P | 700.5043 | M+H | 701.5116 | 1.3 | Lipidmaps |

MS search for 717.5011 *m/z*

| Compound        | Formula                                          | Compound MW | Adduct type | Adduct <i>m/z</i> calc | Delta [ppm] | Database  |
|-----------------|--------------------------------------------------|-------------|-------------|------------------------|-------------|-----------|
| PG(O-16:0/15:0) | C <sub>37</sub> H <sub>75</sub> O <sub>9</sub> P | 694.5149    | M+Na        | 717.5041               | -4.2        | Lipidmaps |
| PG(O-18:0/13:0) | C <sub>37</sub> H <sub>75</sub> O <sub>9</sub> P | 694.5149    | M+Na        | 717.5041               | -4.2        | Lipidmaps |

MS search for 727.5254 *m/z*

| Compound      | Formula                                          | Compound MW | Adduct type | Adduct <i>m/z</i> calc | Delta [ppm] | Database  |
|---------------|--------------------------------------------------|-------------|-------------|------------------------|-------------|-----------|
| PA(17:0/19:0) | C <sub>39</sub> H <sub>77</sub> O <sub>8</sub> P | 704.5356    | M+Na        | 727.5248               | 0.8         | Lipidmaps |
| PA(19:0/17:0) | C <sub>39</sub> H <sub>77</sub> O <sub>8</sub> P | 704.5356    | M+Na        | 727.5248               | 0.8         | Lipidmaps |
| PA(21:0/15:0) | C <sub>39</sub> H <sub>77</sub> O <sub>8</sub> P | 704.5356    | M+Na        | 727.5248               | 0.8         | Lipidmaps |
| PA(22:0/14:0) | C <sub>39</sub> H <sub>77</sub> O <sub>8</sub> P | 704.5356    | M+Na        | 727.5248               | 0.8         | Lipidmaps |
| PA(20:0/16:0) | C <sub>39</sub> H <sub>77</sub> O <sub>8</sub> P | 704.5356    | M+Na        | 727.5248               | 0.8         | Lipidmaps |
| PA(15:0/21:0) | C <sub>39</sub> H <sub>77</sub> O <sub>8</sub> P | 704.5356    | M+Na        | 727.5248               | 0.8         | Lipidmaps |
| PA(14:0/22:0) | C <sub>39</sub> H <sub>77</sub> O <sub>8</sub> P | 704.5356    | M+Na        | 727.5248               | 0.8         | Lipidmaps |
| PA(16:0/20:0) | C <sub>39</sub> H <sub>77</sub> O <sub>8</sub> P | 704.5356    | M+Na        | 727.5248               | 0.8         | Lipidmaps |
| PA(36:0)      | C <sub>39</sub> H <sub>77</sub> O <sub>8</sub> P | 704.5356    | M+Na        | 727.5248               | 0.8         | Lipidmaps |

MS search for 731.489 *m/z*

| Compound                  | Formula                                           | Compound MW | Adduct type | Adduct <i>m/z</i> calc | Delta [ppm] | Database  |
|---------------------------|---------------------------------------------------|-------------|-------------|------------------------|-------------|-----------|
| PG(13:0/20:3(8Z,11Z,14Z)) | C <sub>39</sub> H <sub>71</sub> O <sub>10</sub> P | 730.4785    | M+H         | 731.4858               | 4.4         | Lipidmaps |
| PG(15:0/18:3(6Z,9Z,12Z))  | C <sub>39</sub> H <sub>71</sub> O <sub>10</sub> P | 730.4785    | M+H         | 731.4858               | 4.4         | Lipidmaps |
| PG(15:0/18:3(9Z,12Z,15Z)) | C <sub>39</sub> H <sub>71</sub> O <sub>10</sub> P | 730.4785    | M+H         | 731.4858               | 4.4         | Lipidmaps |
| PG(15:1(9Z)/18:2(9Z,12Z)) | C <sub>39</sub> H <sub>71</sub> O <sub>10</sub> P | 730.4785    | M+H         | 731.4858               | 4.4         | Lipidmaps |
| PG(16:1(9Z)/17:2(9Z,12Z)) | C <sub>39</sub> H <sub>71</sub> O <sub>10</sub> P | 730.4785    | M+H         | 731.4858               | 4.4         | Lipidmaps |
| PG(17:2(9Z,12Z)/16:1(9Z)) | C <sub>39</sub> H <sub>71</sub> O <sub>10</sub> P | 730.4785    | M+H         | 731.4858               | 4.4         | Lipidmaps |
| PG(18:2(9Z,12Z)/15:1(9Z)) | C <sub>39</sub> H <sub>71</sub> O <sub>10</sub> P | 730.4785    | M+H         | 731.4858               | 4.4         | Lipidmaps |
| PG(18:3(6Z,9Z,12Z)/15:0)  | C <sub>39</sub> H <sub>71</sub> O <sub>10</sub> P | 730.4785    | M+H         | 731.4858               | 4.4         | Lipidmaps |
| PG(18:3(9Z,12Z,15Z)/15:0) | C <sub>39</sub> H <sub>71</sub> O <sub>10</sub> P | 730.4785    | M+H         | 731.4858               | 4.4         | Lipidmaps |
| PG(20:3(8Z,11Z,14Z)/13:0) | C <sub>39</sub> H <sub>71</sub> O <sub>10</sub> P | 730.4785    | M+H         | 731.4858               | 4.4         | Lipidmaps |

MS search for 733.502 *m/z*

| Compound               | Formula                                           | Compound MW | Adduct type | Adduct <i>m/z</i> calc | Delta [ppm] | Database  |
|------------------------|---------------------------------------------------|-------------|-------------|------------------------|-------------|-----------|
| PG(13:0/20:2(11Z,14Z)) | C <sub>39</sub> H <sub>73</sub> O <sub>10</sub> P | 732.4941    | M+H         | 733.5014               | 0.8         | Lipidmaps |
| PG(14:1(9Z)/19:1(9Z))  | C <sub>39</sub> H <sub>73</sub> O <sub>10</sub> P | 732.4941    | M+H         | 733.5014               | 0.8         | Lipidmaps |

|                        |                                                   |          |     |          |     |           |
|------------------------|---------------------------------------------------|----------|-----|----------|-----|-----------|
| PG(15:1(9Z)/18:1(9Z))  | C <sub>39</sub> H <sub>73</sub> O <sub>10</sub> P | 732.4941 | M+H | 733.5014 | 0.8 | Lipidmaps |
| PG(16:0/17:2(9Z,12Z))  | C <sub>39</sub> H <sub>73</sub> O <sub>10</sub> P | 732.4941 | M+H | 733.5014 | 0.8 | Lipidmaps |
| PG(16:1(9Z)/17:1(9Z))  | C <sub>39</sub> H <sub>73</sub> O <sub>10</sub> P | 732.4941 | M+H | 733.5014 | 0.8 | Lipidmaps |
| PG(17:1(9Z)/16:1(9Z))  | C <sub>39</sub> H <sub>73</sub> O <sub>10</sub> P | 732.4941 | M+H | 733.5014 | 0.8 | Lipidmaps |
| PG(17:2(9Z,12Z)/16:0)  | C <sub>39</sub> H <sub>73</sub> O <sub>10</sub> P | 732.4941 | M+H | 733.5014 | 0.8 | Lipidmaps |
| PG(18:1(9Z)/15:1(9Z))  | C <sub>39</sub> H <sub>73</sub> O <sub>10</sub> P | 732.4941 | M+H | 733.5014 | 0.8 | Lipidmaps |
| PG(18:2(9Z,12Z)/15:0)  | C <sub>39</sub> H <sub>73</sub> O <sub>10</sub> P | 732.4941 | M+H | 733.5014 | 0.8 | Lipidmaps |
| PG(19:1(9Z)/14:1(9Z))  | C <sub>39</sub> H <sub>73</sub> O <sub>10</sub> P | 732.4941 | M+H | 733.5014 | 0.8 | Lipidmaps |
| PG(20:2(11Z,14Z)/13:0) | C <sub>39</sub> H <sub>73</sub> O <sub>10</sub> P | 732.4941 | M+H | 733.5014 | 0.8 | Lipidmaps |
| PG(15:0/18:2(9Z,12Z))  | C <sub>39</sub> H <sub>73</sub> O <sub>10</sub> P | 732.4941 | M+H | 733.5014 | 0.8 | Lipidmaps |

**MS search for 753.1973 m/z**

| Compound                            | Formula                                           | Compound MW | Adduct type                     | Adduct m/z calc | Delta [ppm] | Database  |
|-------------------------------------|---------------------------------------------------|-------------|---------------------------------|-----------------|-------------|-----------|
| PI(22:6(4Z,7Z,10Z,13Z,16Z,19Z)/0:0) | C <sub>31</sub> H <sub>49</sub> O <sub>12</sub> P | 644.2962    | M+Ag <sub>10</sub> <sub>9</sub> | 753.2004        | -4.1        | Lipidmaps |

**MS search for 753.3986 m/z**

| Compound                                                             | Formula                                                         | Compound MW | Adduct type                     | Adduct m/z calc | Delta [ppm] | Database  |
|----------------------------------------------------------------------|-----------------------------------------------------------------|-------------|---------------------------------|-----------------|-------------|-----------|
| N-(nonadecanoyl)-4E,6E-tetradecasphingadienine-1-phosphoethanolamine | C <sub>35</sub> H <sub>69</sub> N <sub>2</sub> O <sub>6</sub> P | 644.4893    | M+Ag <sub>10</sub> <sub>9</sub> | 753.3935        | 6.7         | Lipidmaps |
| N-(octadecanoyl)-4E,6E-pentadecasphingadienine-1-phosphoethanolamine | C <sub>35</sub> H <sub>69</sub> N <sub>2</sub> O <sub>6</sub> P | 644.4893    | M+Ag <sub>10</sub> <sub>9</sub> | 753.3935        | 6.7         | Lipidmaps |

**MS search for 753.5419 m/z**

| Compound                        | Formula                                          | Compound MW | Adduct type | Adduct m/z calc | Delta [ppm] | Database  |
|---------------------------------|--------------------------------------------------|-------------|-------------|-----------------|-------------|-----------|
| PA(18:2(9Z,12Z)/22:2(13Z,16Z))  | C <sub>43</sub> H <sub>77</sub> O <sub>8</sub> P | 752.5356    | M+H         | 753.5429        | -1.3        | Lipidmaps |
| PA(18:3(6Z,9Z,12Z)/22:1(11Z))   | C <sub>43</sub> H <sub>77</sub> O <sub>8</sub> P | 752.5356    | M+H         | 753.5429        | -1.3        | Lipidmaps |
| PA(18:3(9Z,12Z,15Z)/22:1(11Z))  | C <sub>43</sub> H <sub>77</sub> O <sub>8</sub> P | 752.5356    | M+H         | 753.5429        | -1.3        | Lipidmaps |
| PA(18:4(6Z,9Z,12Z,15Z)/22:0)    | C <sub>43</sub> H <sub>77</sub> O <sub>8</sub> P | 752.5356    | M+H         | 753.5429        | -1.3        | Lipidmaps |
| PA(20:1(11Z)/20:3(8Z,11Z,14Z))  | C <sub>43</sub> H <sub>77</sub> O <sub>8</sub> P | 752.5356    | M+H         | 753.5429        | -1.3        | Lipidmaps |
| PA(20:2(11Z,14Z)/20:2(11Z,14Z)) | C <sub>43</sub> H <sub>77</sub> O <sub>8</sub> P | 752.5356    | M+H         | 753.5429        | -1.3        | Lipidmaps |
| PA(20:3(8Z,11Z,14Z)/20:1(11Z))  | C <sub>43</sub> H <sub>77</sub> O <sub>8</sub> P | 752.5356    | M+H         | 753.5429        | -1.3        | Lipidmaps |
| PA(20:4(5Z,8Z,11Z,14Z)/20:0)    | C <sub>43</sub> H <sub>77</sub> O <sub>8</sub> P | 752.5356    | M+H         | 753.5429        | -1.3        | Lipidmaps |
| PA(22:0/18:4(6Z,9Z,12Z,15Z))    | C <sub>43</sub> H <sub>77</sub> O <sub>8</sub> P | 752.5356    | M+H         | 753.5429        | -1.3        | Lipidmaps |
| PA(22:1(11Z)/18:3(6Z,9Z,12Z))   | C <sub>43</sub> H <sub>77</sub> O <sub>8</sub> P | 752.5356    | M+H         | 753.5429        | -1.3        | Lipidmaps |
| PA(22:1(11Z)/18:3(9Z,12Z,15Z))  | C <sub>43</sub> H <sub>77</sub> O <sub>8</sub> P | 752.5356    | M+H         | 753.5429        | -1.3        | Lipidmaps |
| PA(22:2(13Z,16Z)/18:2(9Z,12Z))  | C <sub>43</sub> H <sub>77</sub> O <sub>8</sub> P | 752.5356    | M+H         | 753.5429        | -1.3        | Lipidmaps |
| PA(22:4(7Z,10Z,13Z,16Z)/18:0)   | C <sub>43</sub> H <sub>77</sub> O <sub>8</sub> P | 752.5356    | M+H         | 753.5429        | -1.3        | Lipidmaps |
| PA(20:0/20:4(5Z,8Z,11Z,14Z))    | C <sub>43</sub> H <sub>77</sub> O <sub>8</sub> P | 752.5356    | M+H         | 753.5429        | -1.3        | Lipidmaps |
| PA(18:0/22:4(7Z,10Z,13Z,16Z))   | C <sub>43</sub> H <sub>77</sub> O <sub>8</sub> P | 752.5356    | M+H         | 753.5429        | -1.3        | Lipidmaps |

|                                         |                                                |          |     |         |      |           |
|-----------------------------------------|------------------------------------------------|----------|-----|---------|------|-----------|
| TG(12:0/12:0/18:4(6Z,9Z,12Z,15Z))[iso3] | C <sub>45</sub> H <sub>78</sub> O <sub>6</sub> | 714.5798 | M+K | 753.543 | -1.5 | Lipidmaps |
|-----------------------------------------|------------------------------------------------|----------|-----|---------|------|-----------|

MS search for 755.5594 *m/z*

| Compound                             | Formula                                        | Compound MW | Adduct type | Adduct <i>m/z</i> calc | Delta [ppm] | Database  |
|--------------------------------------|------------------------------------------------|-------------|-------------|------------------------|-------------|-----------|
| TG(14:1(9Z)/14:1(9Z)/14:1(9Z))       | C <sub>45</sub> H <sub>80</sub> O <sub>6</sub> | 716.5955    | M+K         | 755.5587               | 1           | Lipidmaps |
| TG(12:0/12:0/18:3(6Z,9Z,12Z))[iso3]  | C <sub>45</sub> H <sub>80</sub> O <sub>6</sub> | 716.5955    | M+K         | 755.5587               | 1           | Lipidmaps |
| TG(12:0/12:0/18:3(9Z,12Z,15Z))[iso3] | C <sub>45</sub> H <sub>80</sub> O <sub>6</sub> | 716.5955    | M+K         | 755.5587               | 1           | Lipidmaps |

MS search for 757.5609 *m/z*

| Compound       | Formula                                                         | Compound MW | Adduct type | Adduct <i>m/z</i> calc | Delta [ppm] | Database  |
|----------------|-----------------------------------------------------------------|-------------|-------------|------------------------|-------------|-----------|
| SM(d18:0/17:0) | C <sub>40</sub> H <sub>83</sub> N <sub>2</sub> O <sub>6</sub> P | 718.5989    | M+K         | 757.562                | -1.5        | Lipidmaps |

MS search for 759.522 *m/z*

| Compound                   | Formula                                           | Compound MW | Adduct type | Adduct <i>m/z</i> calc | Delta [ppm] | Database  |
|----------------------------|---------------------------------------------------|-------------|-------------|------------------------|-------------|-----------|
| PG(15:0/20:3(8Z,11Z,14Z))  | C <sub>41</sub> H <sub>75</sub> O <sub>10</sub> P | 758.5098    | M+H         | 759.5171               | 6.5         | Lipidmaps |
| PG(15:1(9Z)/20:2(11Z,14Z)) | C <sub>41</sub> H <sub>75</sub> O <sub>10</sub> P | 758.5098    | M+H         | 759.5171               | 6.5         | Lipidmaps |
| PG(17:0/18:3(6Z,9Z,12Z))   | C <sub>41</sub> H <sub>75</sub> O <sub>10</sub> P | 758.5098    | M+H         | 759.5171               | 6.5         | Lipidmaps |
| PG(17:0/18:3(9Z,12Z,15Z))  | C <sub>41</sub> H <sub>75</sub> O <sub>10</sub> P | 758.5098    | M+H         | 759.5171               | 6.5         | Lipidmaps |
| PG(17:1(9Z)/18:2(9Z,12Z))  | C <sub>41</sub> H <sub>75</sub> O <sub>10</sub> P | 758.5098    | M+H         | 759.5171               | 6.5         | Lipidmaps |
| PG(17:2(9Z,12Z)/18:1(9Z))  | C <sub>41</sub> H <sub>75</sub> O <sub>10</sub> P | 758.5098    | M+H         | 759.5171               | 6.5         | Lipidmaps |
| PG(18:1(9Z)/17:2(9Z,12Z))  | C <sub>41</sub> H <sub>75</sub> O <sub>10</sub> P | 758.5098    | M+H         | 759.5171               | 6.5         | Lipidmaps |
| PG(18:2(9Z,12Z)/17:1(9Z))  | C <sub>41</sub> H <sub>75</sub> O <sub>10</sub> P | 758.5098    | M+H         | 759.5171               | 6.5         | Lipidmaps |
| PG(18:3(6Z,9Z,12Z)/17:0)   | C <sub>41</sub> H <sub>75</sub> O <sub>10</sub> P | 758.5098    | M+H         | 759.5171               | 6.5         | Lipidmaps |
| PG(18:3(9Z,12Z,15Z)/17:0)  | C <sub>41</sub> H <sub>75</sub> O <sub>10</sub> P | 758.5098    | M+H         | 759.5171               | 6.5         | Lipidmaps |
| PG(20:2(11Z,14Z)/15:1(9Z)) | C <sub>41</sub> H <sub>75</sub> O <sub>10</sub> P | 758.5098    | M+H         | 759.5171               | 6.5         | Lipidmaps |
| PG(20:3(8Z,11Z,14Z)/15:0)  | C <sub>41</sub> H <sub>75</sub> O <sub>10</sub> P | 758.5098    | M+H         | 759.5171               | 6.5         | Lipidmaps |

MS search for 783.598 *m/z*

| Compound                    | Formula                                         | Compound MW | Adduct type | Adduct <i>m/z</i> calc | Delta [ppm] | Database  |
|-----------------------------|-------------------------------------------------|-------------|-------------|------------------------|-------------|-----------|
| MGDG(18:1(9Z)/18:1(9Z))     | C <sub>45</sub> H <sub>82</sub> O <sub>10</sub> | 782.5908    | M+H         | 783.5981               | -0.1        | Lipidmaps |
| MGDG(18:0(9Z)/18:2(9Z,12Z)) | C <sub>45</sub> H <sub>82</sub> O <sub>10</sub> | 782.5908    | M+H         | 783.5981               | -0.1        | Lipidmaps |

MS search for 787.6659 *m/z*

| Compound       | Formula                                                         | Compound MW | Adduct type | Adduct <i>m/z</i> calc | Delta [ppm] | Database  |
|----------------|-----------------------------------------------------------------|-------------|-------------|------------------------|-------------|-----------|
| SM(d16:1/24:0) | C <sub>45</sub> H <sub>91</sub> N <sub>2</sub> O <sub>6</sub> P | 786.6615    | M+H         | 787.6688               | -3.6        | Lipidmaps |

MS search for 798.3673 *m/z*

| Compound            | Formula                                           | Compound MW | Adduct type         | Adduct <i>m/z</i> calc | Delta [ppm] | Database  |
|---------------------|---------------------------------------------------|-------------|---------------------|------------------------|-------------|-----------|
| PS(P-16:0/14:1(9Z)) | C <sub>36</sub> H <sub>68</sub> NO <sub>9</sub> P | 689.4632    | M+Ag <sup>109</sup> | 798.3674               | -0.1        | Lipidmaps |

**MS search for 817.4395 *m/z***

| Compound                                 | Formula                                           | Compound MW | Adduct type         | Adduct <i>m/z</i> calc | Delta [ppm] | Database  |
|------------------------------------------|---------------------------------------------------|-------------|---------------------|------------------------|-------------|-----------|
| PG(15:1(9Z)/22:6(4Z,7Z,10Z,13Z,16Z,19Z)) | C <sub>43</sub> H <sub>71</sub> O <sub>10</sub> P | 778.4785    | M+K                 | 817.4416               | -2.6        | Lipidmaps |
| PG(17:2(9Z,12Z)/20:5(5Z,8Z,11Z,14Z,17Z)) | C <sub>43</sub> H <sub>71</sub> O <sub>10</sub> P | 778.4785    | M+K                 | 817.4416               | -2.6        | Lipidmaps |
| PG(20:5(5Z,8Z,11Z,14Z,17Z)/17:2(9Z,12Z)) | C <sub>43</sub> H <sub>71</sub> O <sub>10</sub> P | 778.4785    | M+K                 | 817.4416               | -2.6        | Lipidmaps |
| PG(22:6(4Z,7Z,10Z,13Z,16Z,19Z)/15:1(9Z)) | C <sub>43</sub> H <sub>71</sub> O <sub>10</sub> P | 778.4785    | M+K                 | 817.4416               | -2.6        | Lipidmaps |
| PG(O-18:0/14:0)                          | C <sub>38</sub> H <sub>77</sub> O <sub>9</sub> P  | 708.5305    | M+Ag <sup>109</sup> | 817.4347               | 5.8         | Lipidmaps |
| PG(O-20:0/12:0)                          | C <sub>38</sub> H <sub>77</sub> O <sub>9</sub> P  | 708.5305    | M+Ag <sup>109</sup> | 817.4347               | 5.8         | Lipidmaps |
| PG(O-16:0/16:0)                          | C <sub>38</sub> H <sub>77</sub> O <sub>9</sub> P  | 708.5305    | M+Ag <sup>109</sup> | 817.4347               | 5.8         | Lipidmaps |

**MS search for 837.6529 *m/z***

| Compound                                                              | Formula                                        | Compound MW | Adduct type | Adduct <i>m/z</i> calc | Delta [ppm] | Database  |
|-----------------------------------------------------------------------|------------------------------------------------|-------------|-------------|------------------------|-------------|-----------|
| 3-O-(6'-O-octadecanoyl-beta-D-glucopyranosyl)-cholest-5-en-3beta-ol   | C <sub>51</sub> H <sub>90</sub> O <sub>7</sub> | 814.6687    | M+Na        | 837.6579               | -5.9        | Lipidmaps |
| 3-O-(6'-O-hexadecanoyl-beta-D-glucopyranosyl)-stigmast-5-en-3beta-ol  | C <sub>51</sub> H <sub>90</sub> O <sub>7</sub> | 814.6687    | M+Na        | 837.6579               | -5.9        | Lipidmaps |
| Stigmast-5-en-3beta-ol 3-O-(6'-O-hexadecanoyl-beta-D-glucopyranoside) | C <sub>51</sub> H <sub>90</sub> O <sub>7</sub> | 814.6687    | M+Na        | 837.6579               | -5.9        | Lipidmaps |

**MS search for 839.6733 *m/z***

| Compound                                                                         | Formula                                        | Compound MW | Adduct type | Adduct <i>m/z</i> calc | Delta [ppm] | Database  |
|----------------------------------------------------------------------------------|------------------------------------------------|-------------|-------------|------------------------|-------------|-----------|
| 3-O-(6'-O-(11Z,14Z-eicosadienoyl)-beta-D-glucopyranosyl)-cholest-5-en-3beta-ol   | C <sub>53</sub> H <sub>90</sub> O <sub>7</sub> | 838.6687    | M+H         | 839.6759               | -3.1        | Lipidmaps |
| 3-O-(6'-O-(9Z,12Z-octadecadienoyl)-beta-D-glucopyranosyl)-stigmast-5-en-3beta-ol | C <sub>53</sub> H <sub>90</sub> O <sub>7</sub> | 838.6687    | M+H         | 839.6759               | -3.1        | Lipidmaps |
| 3-O-(6'-O-(9Z-octadecenoyl)-beta-D-glucopyranosyl)-stigmast-5,22E-dien-3beta-ol  | C <sub>53</sub> H <sub>90</sub> O <sub>7</sub> | 838.6687    | M+H         | 839.6759               | -3.1        | Lipidmaps |

MS search for 1088.4206 *m/z*

| Compound       | Formula                                                                         | Compound MW | Adduct type | Adduct <i>m/z</i> calc | Delta [ppm] | Database  |
|----------------|---------------------------------------------------------------------------------|-------------|-------------|------------------------|-------------|-----------|
| CoA(22:1(13Z)) | C <sub>43</sub> H <sub>76</sub> N <sub>7</sub> O <sub>17</sub> P <sub>3</sub> S | 1087.4231   | M+H         | 1088.4304              | -9          | Lipidmaps |

MS search for 1571.8431 *m/z*

| Compound                                                              | Formula                                                         | Compound MW | Adduct type | Adduct <i>m/z</i> calc | Delta [ppm] | Database  |
|-----------------------------------------------------------------------|-----------------------------------------------------------------|-------------|-------------|------------------------|-------------|-----------|
| KDNalpha2-3Galbeta1-3GalNAcbeta1-4Galbeta1-4Glcbeta-Cer(d18:1/20:0)   | C <sub>73</sub> H <sub>132</sub> N <sub>2</sub> O <sub>31</sub> | 1532.8814   | M+K         | 1571.8446              | -0.9        | Lipidmaps |
| Galbeta1-3GalNAcbeta1-4(KDNalpha2-3)Galbeta1-4Glcbeta-Cer(d18:1/20:0) | C <sub>73</sub> H <sub>132</sub> N <sub>2</sub> O <sub>31</sub> | 1532.8814   | M+K         | 1571.8446              | -0.9        | Lipidmaps |
| KDNalpha2-3Galbeta1-3GlcNAcbeta1-3Galbeta1-4Glcbeta-Cer(d18:1/20:0)   | C <sub>73</sub> H <sub>132</sub> N <sub>2</sub> O <sub>31</sub> | 1532.8814   | M+K         | 1571.8446              | -0.9        | Lipidmaps |
| KDNalpha2-6Galbeta1-3GlcNAcbeta1-3Galbeta1-4Glcbeta-Cer(d18:1/20:0)   | C <sub>73</sub> H <sub>132</sub> N <sub>2</sub> O <sub>31</sub> | 1532.8814   | M+K         | 1571.8446              | -0.9        | Lipidmaps |
| KDNalpha2-3Galbeta1-4GlcNAcbeta1-3Galbeta1-4Glcbeta-Cer(d18:1/20:0)   | C <sub>73</sub> H <sub>132</sub> N <sub>2</sub> O <sub>31</sub> | 1532.8814   | M+K         | 1571.8446              | -0.9        | Lipidmaps |
| KDNalpha2-6Galbeta1-4GlcNAcbeta1-3Galbeta1-4Glcbeta-Cer(d18:1/20:0)   | C <sub>73</sub> H <sub>132</sub> N <sub>2</sub> O <sub>31</sub> | 1532.8814   | M+K         | 1571.8446              | -0.9        | Lipidmaps |

MS search for 1966.979 *m/z*

| Compound                                                                                                  | Formula                                                         | Compound MW | Adduct type | Adduct <i>m/z</i> calc | Delta [ppm] | Database  |
|-----------------------------------------------------------------------------------------------------------|-----------------------------------------------------------------|-------------|-------------|------------------------|-------------|-----------|
| Galbeta1-4(Fucalpha1-3)GlcNAcbeta1-6(Galbeta1-3)GalNAcbeta1-3Galalpha1-4Galbeta1-4Glcbeta-Cer(d18:1/18:0) | C <sub>88</sub> H <sub>157</sub> N <sub>3</sub> O <sub>42</sub> | 1928.0242   | M+K         | 1966.9873              | -4.2        | Lipidmaps |
| Galalpha1-3(Fucalpha1-2)Galbeta1-4GlcNAcbeta1-3Galbeta1-4GlcNAcbeta1-3Galbeta1-4Glcbeta-Cer(d18:1/18:0)   | C <sub>88</sub> H <sub>157</sub> N <sub>3</sub> O <sub>42</sub> | 1928.0242   | M+K         | 1966.9873              | -4.2        | Lipidmaps |

Delta - calculated as  $[(m/z_{\text{calc.}} - m/z_{\text{meas.}}) * 10^6] / m/z_{\text{calc.}}$ , where  $m/z_{\text{calc}}$  calculated compound  $m/z$ ;  $m/z_{\text{meas}}$  measured  $m/z$ .
